# Supplementary material for: A fingerprint-based polymeric sensing platform for comprehensive quality assessment of complex culture media in cell manufacturing
Source: Chem Sci. 2026 Apr 17;17(18):9006–17. doi: 10.1039/d6sc00383d (PMC13088908; doi:10.1039/d6sc00383d)
Supplement: SC-017-D6SC00383D-s001 [file SC-017-D6SC00383D-s001.xlsx]

## Sheet: Dataset S1
Dataset S1. Data set matrix of the differences in fluorescence intensity before and after the addition of animal sera (0.10 vol%) to the AIE-polymers. The rightmost column indicates whether the data in the corresponding row was used as training data (denoted by “–”) or test data (results of the verification are shown) in the holdout test.
Analytes		pH = 7.0												pH = 5.0												Verification by Holdout test
		P-None		P-Phe		P-Nle		P-Suc		P-Pht		P-Pyr		P-None		P-Phe		P-Nle		P-Suc		P-Pht		P-Pyr
Species	Orders	Ch1	Ch2	Ch1	Ch2	Ch1	Ch2	Ch1	Ch2	Ch1	Ch2	Ch1	Ch2	Ch1	Ch2	Ch1	Ch2	Ch1	Ch2	Ch1	Ch2	Ch1	Ch2	Ch1	Ch2
Dog	Carnivora	14918.6	5292.4	-964.6	-52	4649.6	1713.2	7623.8	2728.2	19093.2	5843.6	9247.6	3313.2	10951.4	3995.4	13763.2	4611.6	12597.6	3419.6	11019	3419.6	5725.8	1394.4	15794.8	5272.8	-
Dog	Carnivora	14203.8	5056.4	-636.8	39.2	4545.8	1665.4	7312.4	2610.4	18773.8	5743.2	9043	3244.2	10613.4	3862.2	15007	5562.6	12066.2	3217.6	10370.6	3217.6	6038.6	1386	15284.6	5104.8	-
Dog	Carnivora	15428.2	5329.8	-344	109	5508.8	1951.2	7778.8	2773.8	19707	5990.6	9557.4	3461.8	11297.6	4038.4	14352.4	4789.2	13055	3374	11101.6	3374	5826.4	1268	16245.2	5365.6	-
Dog	Carnivora	15063.2	5217.2	-44	217.2	5262.4	1916.2	7584.6	2661.6	19481.8	5934.4	9191.2	3271.6	10978.6	3910.6	13812.8	4584.2	12754.8	3346.2	10749.4	3346.2	6030	1326.6	15859.2	5234.6	-
Dog	Carnivora	14950.8	5248	-385	96.6	5121	1839.6	7614.4	2725.4	19105.6	5852.4	9146	3274.4	10983.8	3977.4	14043.8	4638.2	12686.2	3343	10746.6	3343	6790.2	1604.2	15958.2	5255	-
Dog	Carnivora	14595.4	5129.8	-90.6	214.8	5166.4	1840.4	7483.6	2660.2	19078	5790.2	9083.2	3236.2	10859.2	3861.6	13589.8	4514.6	12565.8	3346.4	10768.4	3346.4	6617.8	1591.4	15814	5177.4	-
Dog	Carnivora	16186.2	5641.6	-785.2	10	5484.8	1964	8296.4	2910.4	20424.2	6148.2	9904.2	3479.2	11811.6	4207.8	15085.4	4938.2	13783.8	3415.6	11377.6	3415.6	5279.4	1211	17231.4	5655	Dog
Dog	Carnivora	15636.2	5411.2	-202.8	162.4	5585.2	2041.8	7649.2	2707.2	19890.2	6000.4	9443.6	3355	11249.6	4031.2	14445	4766.6	12917.4	3305	10520.4	3305	5506.4	1251.4	16230.8	5340.8	Dog
Dog	Carnivora	15076.4	5273	-526.6	34.6	4770	1724.8	7436.4	2611	19371	5831.2	9065	3212	11043.6	3928.8	13515	4452.6	12550.2	3155.8	10331.6	3155.8	5871.4	1369.4	15434	5088.4	Dog
Dog	Carnivora	14880.6	5183	-747	13.2	4573.4	1642.8	7526.4	2611.8	18813	5663.6	10318	4001.4	10921.8	3941.4	13828.6	4560.8	13028.4	3247.6	10467	3247.6	6356.4	1582.4	15946.6	5215	Dog
Goat	Artiodactyla	13056.4	4369	-932.8	-181.6	3697	1291.8	9724.8	3592.2	19369.6	6875.6	11986.4	4527.8	10363	3639.4	12484.8	4090.6	11486.4	3854.8	11472.8	3574	3408	1376.2	17679.4	5872	-
Goat	Artiodactyla	12549.8	4149.6	-287	5.8	3575.4	1259.4	9349	3460.6	19276.2	6756.8	11722	4448.6	9846.8	3494.4	12162.6	4029.2	11012.8	3688.4	11205.2	3501.4	3627.6	1359.2	17050.6	5720.8	-
Goat	Artiodactyla	13925	4490.6	-506	17.6	4260.6	1419.8	9647.8	3577	19878.6	6937.2	12133	4587	10345.6	3614.4	12891.2	4260.4	11428	3784.6	11403.8	3536	3902	1436.6	18054.2	6028.4	-
Goat	Artiodactyla	13251.4	4370.8	-175.8	62.4	4146.8	1396.8	9610.2	3540	19764.6	6977.6	12045.6	4520	10246.6	3559.2	12549.6	4120	11519	3838	11041	3421.2	3491.4	1302.8	17723.4	5853.2	-
Goat	Artiodactyla	13500.6	4436	-390.6	-21	3920.2	1375.8	9751	3613.2	19465.4	6830.8	11786	4465.6	9992.8	3510	12330.2	4080.8	11119.6	3748.2	11181.2	3513	3606.6	1456.6	17286.2	5797.4	-
Goat	Artiodactyla	13156	4321.6	-292.4	12.6	3895	1350.4	9563.8	3566.4	19527.2	6888.6	11874.8	4488.4	9879.8	3468.6	12288.4	4015.2	11200	3745.8	11196	3522.2	3900.4	1482.6	17206.8	5752.4	-
Goat	Artiodactyla	14373	4658.2	-874.2	-114	4269	1467	10308	3777.4	21038.6	7332.8	12790.4	4790.6	10600.8	3650	13431.2	4285.4	11986.4	3928.8	11572	3567.8	3046.2	1303.8	18941.8	6248.2	Goat
Goat	Artiodactyla	13782.4	4496.6	-479.8	-15.4	4370.4	1443.6	9759.2	3562.6	20068.6	6952.8	12206	4553.8	10194	3556	12821.4	4128.6	11552.8	3820.2	10988.4	3427.4	3496.4	1330.6	17799	5794.4	Goat
Goat	Artiodactyla	13119.4	4297.6	-415	-5.4	3486.6	1172.8	9562.4	3558.6	19805	6837.8	11850.6	4414.4	10151.8	3511.6	12144	3996.6	11442	3788.8	10796.8	3316	3419.2	1296.4	17240	5679.2	Goat
Goat	Artiodactyla	13237.2	4345.4	-773.6	-162.4	3551.8	1191.4	9717.2	3590	20021.8	7023.4	12115.8	4569	10390	3611	12975.4	4178	11407.8	3785.6	10761.6	3311.4	3555.8	1317.4	17511	5792.8	Goat
Cat	Carnivora	12926.8	4423.6	785	204	5821.8	1872	5376.8	1889.2	13932.8	4383	5924.2	2202.2	12284.2	4373.6	15432.2	4967.6	14590.6	4727.8	10254.8	3036.8	5750.2	1174.2	17757.4	5861.4	-
Cat	Carnivora	12144.8	4095.8	883	296.6	5600.2	1786.4	5281.8	1867.6	13750.8	4286.6	5833.4	2116	12010.6	4211.8	14992.2	4763.6	14068.6	4501.8	10021.4	2865.6	6058	1269.2	17244.8	5590	-
Cat	Carnivora	13402.8	4446.8	1025.2	310	6294.8	1961.4	5556.6	1953	14386.6	4532.6	6147.4	2202.6	12533	4329.2	15673.2	4989.8	14975.8	4720.6	10435	2955.8	6312.8	1323.4	17859.6	5759	-
Cat	Carnivora	12941	4330.8	1168.4	362.8	6597.4	2096.8	5488.6	1865.8	14081.8	4384.4	5932.6	2100.2	12162.2	4234.8	15157	4807.4	14381	4589.8	10130.8	2849.6	6178.8	1267.6	17527	5697.6	-
Cat	Carnivora	12916.6	4323.2	1229	388.8	6253	2016.6	5350.6	1863.2	13991	4367.4	5998.4	2153.4	11998.2	4211.2	15233.8	4908.2	13963.8	4492.6	10127.8	2900.8	6702.4	1380.6	17395.8	5647	-
Cat	Carnivora	12737	4230.6	1248	327.6	6379.2	2034	5284.6	1840.6	13795.4	4313.4	5865.4	2107.6	11965.2	4171	14692.6	4658.4	13912	4500.2	10111.6	2827.8	6528.2	1442.4	17424.8	5682.6	-
Cat	Carnivora	14189	4653.4	1045	317.8	6739.8	2011	5916.2	2011.6	15130.6	4621.2	6433.8	2249.6	12937.6	4499	15856.6	4952	15433.8	4835.6	10604.8	2952.8	6566.6	1267.2	18971.2	6076	Cat
Cat	Carnivora	13615.8	4529	1303.8	410.2	6701.2	2124	5403.8	1889.8	14359.6	4421.2	6041.4	2158.4	12200	4264.8	15365.8	4830.4	14794.8	4640.4	9783.6	2793.6	6104.4	1189.6	17776.8	5684.2	Cat
Cat	Carnivora	13090	4345.8	930.8	298.6	5908.4	1781.6	5292	1826.2	13970.8	4325.2	5920	2088.6	12268.4	4208	14903	4690.2	14235.6	4468.2	9505.8	2717.2	6027	1250.6	17437.2	5600.2	Cat
Cat	Carnivora	12938.6	4271.6	845.4	281.2	5620	1706.2	5368	1855.6	14169.2	4352.4	6326.6	2249.6	12967.2	4513.6	15589.8	4963.2	14185.8	4507.6	9738.8	2711.6	5390.8	980.2	17408.8	5637.2	Cat
Chicken	Galliformes	7409	2156.8	187.4	-92.4	1633.8	467.6	4656.4	1588.8	11933	3768	5128	1759.4	9697.4	3028.2	10655.6	3159.2	9732.6	2970.2	7043.6	2028.2	882.4	51	13287.2	4419.2	-
Chicken	Galliformes	6956.4	2093.2	397.8	7.6	1567	475.6	4615.2	1546	11638	3653.8	5057	1722.2	9348	2933.4	10269.4	3083.2	9610.8	2919.8	6817	1958.4	763.6	67.2	12982.8	4346.2	-
Chicken	Galliformes	7491.8	2144.4	387.6	20.2	1901.4	573.8	4879.4	1623.2	12177.8	3833.4	5302	1816.4	9641	2985	10857.4	3229.2	9985.6	3010.2	6690.6	1881.6	1339.2	267.2	13724.8	4511.4	-
Chicken	Galliformes	7367.2	2155.6	303.2	52.8	1896	555.4	4687.4	1565.4	11937	3716	5137	1738.2	9383	2916	10613.8	3143.6	9801.8	2988.2	6916.4	1937	1103.2	139.6	13294.2	4400.4	-
Chicken	Galliformes	7384.2	2165.2	312.6	94.6	2075.6	602.4	4721.4	1575	11767.6	3720	5121.2	1758.6	9665.4	3035.2	10574.8	3147	9578	2931.6	6822.8	1957.4	1305.8	263.4	13139	4343	-
Chicken	Galliformes	7272	2143.4	211.6	-29.4	2116.8	631.6	4765.4	1575.8	11649.2	3708.6	5045.4	1740.4	9453.8	2935	10524.4	3091.2	9391.6	2880.2	6764	1936	1428.6	326.8	13114	4335.8	-
Chicken	Galliformes	7835.4	2278.6	-63	-64.6	1786	451.2	5022.8	1668.6	12688.6	3918.6	5440.8	1855	9774.6	3014.6	11115.8	3245	10412.8	3083.4	6692.4	1841.2	241.4	-180	14404	4663.4	Chicken
Chicken	Galliformes	7614.6	2212.4	309	35.8	2001.8	593.6	4773.2	1562.2	12220.6	3819.6	5182.8	1786.4	9633	2958	10828.2	3193.4	9957.4	2982.2	6390.4	1827.8	508.8	14.4	13544.2	4474.8	Chicken
Chicken	Galliformes	7635.2	2230	248.4	15.8	1556.2	419.6	4665.8	1570.8	12026	3741	5100.2	1712.4	9402	2921.6	10375.2	3039.4	9704.2	2917.6	6177.8	1748.4	791.8	39.2	13311.4	4377.6	Chicken
Chicken	Galliformes	7536.8	2187.6	229.8	-1	896	196.2	4704.4	1563.2	11800.2	3716.4	5637	1874.2	9681	3025	10620.6	3181.8	9783.8	2984.8	6735.4	1842.4	914.8	27.8	13448.2	4386	Chicken
Rat	Rodentia	17751.2	4801	1037	212.2	5436.6	1684.6	8532.4	2867.4	19609.4	5759.2	9589.6	3424.2	13476.8	4604.6	15796.2	5006.2	13946	4462.4	11775.4	3323.4	4948.6	690.8	17218.2	5276.8	-
Rat	Rodentia	16746	4563	1299.2	330.8	5348	1661.6	8087.2	2723.2	19291.2	5638.2	9408.2	3333	12813.6	4410.6	15571.8	4850.8	13650	4394	11367.6	3203.8	5128.8	732.2	16659	5104.6	-
Rat	Rodentia	17960.4	4848.6	1425.4	379.6	5826.6	1818.8	8510.6	2808.8	20394.4	5977.4	9774.8	3435.4	13612.8	4623.4	16311.2	5109.8	14158.8	4492.4	11532.8	3273	5838.8	1022.4	18089.2	5538.8	-
Rat	Rodentia	17321.4	4698.8	1599.2	431	5455.2	1724.2	8355.4	2803.4	19847.8	5792	9576.6	3392	13051.2	4481	15734.2	4947.8	13889.4	4416.2	11369	3187.8	5010	690.4	17742.6	5370	-
Rat	Rodentia	17224.6	4697.2	1427	368.6	5612.4	1698.6	8498	2833.8	19599.4	5722.4	9439	3332.6	12444.2	4252.6	15563.2	4919	13831	4404.4	11676.6	3307.8	5441.8	861.2	16960.8	5167	-
Rat	Rodentia	17039.2	4625.8	1694.2	469.6	5797.6	1809.2	8557.8	2810.2	19787.4	5720.4	9294.2	3277.4	12290.4	4194.8	15580.2	4901	13530.8	4359	11488	3200	5695.4	960.8	16852	5156.6	-
Rat	Rodentia	18809	4993.6	1556.8	529	5794.8	1762.8	9764.6	3361.2	20972.6	6099.2	10027	3448.6	13828.8	4713.8	16790.6	5147.4	14710.2	4630	11882.2	3279.6	5540.4	825.2	18778.4	5677.4	Rat
Rat	Rodentia	17970.2	4802.2	1510.4	405	5616.6	1714.2	8430.4	2755.8	20130.2	5889	9787.4	3389.8	13359.6	4537.2	15931.6	4943.4	13949.6	4443.6	10888.6	3050.2	4919.8	697.2	18207	5596.8	Rat
Rat	Rodentia	17164.2	4651.6	971.6	285.8	4875.8	1480	8949.6	2993	20237.2	5827.6	9436.2	3315.6	13222.4	4516.8	15102.8	4721.2	13808.8	4378.2	11020.6	3078.8	4802	673.8	17391	5271.8	Rat
Rat	Rodentia	17163.6	4585.4	1314.6	302.6	5544.2	1697	8381.8	2789	20205.8	5796.4	9555.6	3325.8	12602.2	4289	16221.8	4966.4	13672.8	4363	10915.2	3061.2	4968	761.6	17021.8	5177	Rat
Bovine newborn	Artiodactyla	13042	3511.6	-2931.4	-1044.4	2471.2	741.6	8225.6	2865.6	18593.4	6242.6	10168.2	3694.2	8481.2	2856.2	12569.2	3986	11456.4	3743.4	18623.2	7497.2	4612.6	1671.4	24130.4	10022.4	-
Bovine newborn	Artiodactyla	12397.4	3351.6	-2589	-901.6	2776.2	812.4	7696.2	2719.8	18670	6267.8	9842.8	3558.4	8234.2	2751.4	12153	3869.4	11032	3609	17785.4	7231.8	4612.8	1735.4	23398.2	9694.6	-
Bovine newborn	Artiodactyla	13416.6	3545.2	-3278.2	-1124	2371	652.2	7619.6	2648.6	18858.8	6331.8	9506.6	3413.4	8526.2	2840.6	12821.8	4066	11482.2	3731.2	18057.8	7202	5015.6	1744.4	24738.2	10009.8	-
Bovine newborn	Artiodactyla	12715.8	3390.8	-2467.2	-849.6	2706.2	779.4	8213.4	2831.8	19075.8	6385	10267.6	3994.4	8364.4	2809	12517	4020.4	11238.8	3597	17753.4	7122.4	4733.8	1608.4	24325.6	10013.4	-
Bovine newborn	Artiodactyla	12716.6	3452.8	-2645.8	-901.8	2461.6	723.4	7895	2765.2	18647.2	6343.6	9958.8	3612.4	8412	2842.8	12414.8	3928.6	11191.2	3665.4	18189.6	7390.2	4646.4	1718.8	23742.2	9683.8	-
Bovine newborn	Artiodactyla	12836.8	3452.8	-2348.6	-828.6	2456.8	727	7838.4	2734.6	18384.4	6227.4	9769.4	3537.4	8283.4	2719.4	12187.8	3853	10971	3589.2	18037.4	7232.6	4995.6	1735	23579	9699.4	-
Bovine newborn	Artiodactyla	13825.2	3674.8	-3201.2	-1064.2	2510.2	670.4	8264.4	2850.4	19576.4	6484.8	10070.2	3598.2	8513.8	2816.2	12903	4054.8	11773.6	3799.6	18835	7528.4	4404	1611.8	26049.4	10709.6	Bovine newborn
Bovine newborn	Artiodactyla	12913.4	3441.4	-2871.2	-929.2	2559	778	7856.6	2736.2	19135.2	6407.4	10155	3657.8	8281	2743.2	12301.2	3872.4	11376.6	3633.4	17732.6	7192.6	4228.8	1553	25104.4	10259.6	Bovine newborn
Bovine newborn	Artiodactyla	12708.2	3379.8	-2624.6	-868.6	2052.8	562.4	7911	2734.4	19053	6369	10204.6	3648.8	8450.4	2775	11824.8	3724.6	11002.4	3565.2	17715.8	7092.8	4091.4	1510.4	24273.2	9926.8	Bovine newborn
Bovine newborn	Artiodactyla	13106.6	3469.6	-2602.6	-868.4	2971.2	860.6	8176.6	2787.2	19057.8	6397	10097.2	3627.8	8275	2694.4	12660.2	4000	11327.6	3648.6	17814.4	7125.2	4816.6	1743	24403	10015.6	Bovine newborn
Golden hamster	Rodentia	15566.8	4150.6	-1138.8	-297	4424.2	1423.4	8601.8	2936.6	18701.2	5673.6	10083.4	3535.6	12157	4053	14612.2	4722.4	13348.6	4370.2	10571.4	3098.2	4415.6	837	17053.2	5353.2	-
Golden hamster	Rodentia	15083.6	3972.4	-662.2	-123.2	4380.4	1444	8245.4	2878	18228	5547.8	9756.4	3449.2	11775.8	3977.2	14321.4	4657.2	13122.4	4310.2	10494.2	3033.6	4523.4	928	16299.6	5196	-
Golden hamster	Rodentia	15336.4	4078.6	-890.8	-192.4	4665.6	1500.4	8542	2955.8	18879.4	5721.4	10097.2	3505.4	11947.2	3959.2	14785	4765.4	13410.2	4326	10900.2	3148.8	4933.2	1045	17091.4	5369.4	-
Golden hamster	Rodentia	14895.8	4045	-649.2	-148.4	4526.2	1427.6	8315.6	2877.8	18581.6	5618.8	9908.4	3464.6	11894.2	3982.2	14315.2	4604	13130	4249.4	10472.2	2983.4	4459.2	904	16848.4	5262.4	-
Golden hamster	Rodentia	15026.4	4001.8	-1007.4	-253.6	4798.4	1601	8333.2	2867.2	18438.4	5579.2	9861.6	3452	11975.8	3993.6	14445.4	4698.2	13085.4	4284.2	10297.6	3002.8	4504.4	826	16402.4	5197.6	-
Golden hamster	Rodentia	15251	4099.6	-562.2	-7.8	4795.2	1679.4	8234.6	2865.2	18603.6	5618	9756.8	3404.4	11813.2	3934.4	14327.8	4643.6	12922	4252.6	10268.4	3031.6	4517	924.4	16477.4	5190.8	-
Golden hamster	Rodentia	16392.8	4309.8	-1266.2	-276.8	4764.8	1531	9139	3057.8	19796.6	5914.4	10602.4	3679.8	12688.6	4199	15857	5083.4	14262.6	4598.6	10876.6	3085.8	4523.6	887	18148.8	5587.6	Golden hamster
Golden hamster	Rodentia	15622.8	4160	-938.6	-226.2	4466.4	1433.2	8541.2	2902.6	19010	5660	10116.8	3517.2	12235.6	4029.8	14828.6	4752.6	13601.8	4361.2	10243.8	2929.6	4081	794.4	17029	5296	Golden hamster
Golden hamster	Rodentia	15144.2	3985.2	-1106.6	-243.4	3898.4	1241.8	8502.2	2918.4	18472.6	5585	9944.4	3476	12020.2	3968.4	13988.8	4487	13035	4156.8	9914	2838.2	3996.4	768	16921.6	5202.4	Golden hamster
Golden hamster	Rodentia	15319.2	4008.8	-375.8	12.6	5594	1872.4	8643.8	2920.8	18480	5602.6	10174.6	3550.2	11863.8	3880.6	14708.8	4731	13142.6	4267.2	9845	2845.8	4651.4	978.6	16178.6	5092.6	Golden hamster
Bovine fetal	Artiodactyla	12998.6	3888.4	-906.6	-389.4	4351.6	1270.6	7908.2	2789	18701.4	6358.2	10872.2	4026.6	9690.6	3205.2	14331.2	4528.4	12969.6	4202.8	19869.6	8337.4	5017.8	1734.6	24104.4	9594.2	-
Bovine fetal	Artiodactyla	12593.8	3810.6	-773.8	-281.8	4596.2	1366.8	7350.4	2635.4	18340.6	6245.4	10559.2	3867.2	9583.4	3111	14119.8	4485.8	12542	4122.6	19098.4	7971.2	5316.6	1834.8	23259.2	9224.2	-
Bovine fetal	Artiodactyla	13363.4	3935.4	-959	-373	4805.6	1392.8	7330.4	2543.8	18664.2	6302.6	10291.4	3737.8	9664.6	3168	14991.4	4754.2	13219.6	4260.4	19697.2	8127.2	5558.4	1844	24394.6	9670.8	-
Bovine fetal	Artiodactyla	12655.8	3792.8	-316.2	-198	4774.8	1509.2	7755.4	2743.4	18546.6	6327.2	10646.2	3867.2	9394	3089.4	14264.6	4526.6	12779.4	4154.8	19432	8109.8	5455.4	1849.2	23945.8	9435.6	-
Bovine fetal	Artiodactyla	12464.4	3784	-442.2	-226.8	4854.4	1506.2	7793.4	2768.2	18646.2	6370.8	10516.4	3882.4	9547.4	3154.4	14521.6	4621.8	12948.2	4212.4	19602	8089.8	5538.8	1858.4	23963.2	9439.8	-
Bovine fetal	Artiodactyla	12189.2	3669.2	-366.4	-150	4970.8	1513	7615.2	2689	18718.8	6439.4	10417.8	3791	9439.4	3094.8	14310.8	4515.4	12919.6	4168.8	19454.4	8056.2	5697.6	1952	23706.2	9319.6	-
Bovine fetal	Artiodactyla	13751.2	4052.4	-1333.2	-482.2	4578.6	1335.4	5600.6	1955	19625.8	6588.6	10683.4	3876.6	9681.4	3169.4	15428.6	4899.6	13648.6	4370.6	20579.6	8466.8	5499	1811.2	26255.4	10258.4	Bovine fetal
Bovine fetal	Artiodactyla	13097.4	3874.2	-535.4	-235.6	4829.8	1436.4	7825.4	2749.4	19024.6	6430.4	10854.6	3967.8	9472.4	3091.4	14529.8	4592.4	12998.6	4186.6	19358.8	7956	5269.6	1830.2	24726	9777.2	Bovine fetal
Bovine fetal	Artiodactyla	12827.4	3823	-629.4	-279.6	3910.6	1159.2	7590.8	2662.8	18765.8	6393.4	10664.2	3900.2	9403.4	3027	13363.8	4169.8	12346.2	3965.6	19097.8	7956.4	5562.4	1857.8	23840.8	9316.6	Bovine fetal
Bovine fetal	Artiodactyla	12418.2	3728.4	-354.6	-155.2	5789.8	1789.6	7897	2808.4	19014	6529	11164.8	4122	9186.6	2990.8	14594.6	4605.8	13260.8	4270	19332	8007.4	5386.4	1837.6	23375	9190.4	Bovine fetal
Human	Primates	19322.4	6915.2	-672	-224	5848.6	1670.4	9501.6	3891.2	24108.8	7941.6	12488.4	4725.2	11118.4	3708.8	14327.6	4541.8	12718.6	3744.4	12371.4	3744.4	7697.2	2056	16477.4	5742.4	-
Human	Primates	18740	6646.8	-357.6	-178.6	6195.4	1814.2	9347.2	3826.2	24080.2	7911.2	12355	4672.6	10767.4	3597.8	14207.4	4502.8	12524.2	3637	12175.2	3637	7486.6	1970.6	16115	5600.4	-
Human	Primates	17837	6327.8	-294.4	-91.8	5501.4	1689.4	9057.4	3719.8	23059.4	7571	11850.4	4525.4	10547.8	3543.8	13842.6	4337	12233.4	3581.8	11944.8	3581.8	7596.8	2016.4	15561.4	5440.8	-
Human	Primates	17377.2	6133.6	-438.4	-159.2	4575.8	1394.6	8874.6	3665.4	23191.8	7610.2	13359.6	5376.8	10390.6	3505	13050.6	4114	11679.8	3540.2	11723.6	3540.2	7024.4	1865.2	15416.2	5437	-
Human	Primates	17290.4	6042.4	-304.4	-94.4	5064.2	1577.8	8831.6	3643.8	22176.2	7272.6	11555.4	4443.8	10405.6	3500.6	13387.8	4266.2	11868.4	3436	11450	3436	7562	2025.6	15168	5366.8	-
Human	Primates	17079	5962.6	-3	-7.2	5232.6	1593.4	8739.6	3612.4	22747.4	7480	11565.6	4487.4	10307	3428	13329.2	4199.6	11854	3494.8	11559.4	3494.8	7534.4	2051	15198.6	5367.6	-
Human	Primates	17537	6312.8	-643	-318.8	5320.6	1641.6	9126.4	3806.6	23529.4	7825.2	11985.8	4722	10708.8	3631	14059.4	4498.4	12455.8	3530.6	11645.6	3530.6	7256.4	1889.4	15987.4	5668.6	Human
Human	Primates	17259	6127.2	-437.4	-141.6	5145	1593	8836.2	3780	22743.2	7650.8	11641	4581.8	10482.8	3581	13655.2	4371.2	12071.4	3467.8	11379.4	3467.8	7287.2	1932.8	15527.8	5516	Human
Human	Primates	16631.6	5932.4	-366.4	-145.2	4915.8	1494	8638.2	3614.8	21982.8	7300.2	11268.2	4403.8	10002.4	3430.8	12971.4	4152	11597.6	3329	10957	3329	7189.2	1893	14911	5322	Human
Human	Primates	16859	6036.8	-377.8	-154.8	4756	1525.2	8578.2	3628.8	22417.8	7479.8	11417.6	4469.4	10361	3497.6	13135	4211.6	11659.8	3382.2	11117	3382.2	7949.8	2199.2	14689.8	5232	Human
Horse	Perissodactyla	17203.8	4944	-18.2	-165.4	5272.6	1428.8	7692.4	2498.2	22156	7030.8	10917.8	3615	10653.4	3567.4	14815.6	4575.2	13219.2	4147	9411.8	2799	6588.8	1701.6	18870.8	6281	-
Horse	Perissodactyla	16787	4886	271	-7.6	5711	1529.6	7484	2453.8	21623.8	6876.2	10563.6	3544.4	10505	3456.6	14621	4516	13225.6	4142.6	9137	2694.2	6335.6	1573	18608.2	6187.8	-
Horse	Perissodactyla	15961.8	4693.2	72	-58.8	5062	1404.6	7296.6	2445.2	21120.2	6673.2	10256.2	3445	10328.4	3402.4	14488.4	4492.6	12852.8	4027.6	8935.6	2672.6	6401	1555.4	17899.6	5968.2	-
Horse	Perissodactyla	15622.2	4525.2	-63.8	-105.2	4303.4	1164.6	7029.4	2339.4	20946.6	6662.2	9831.8	3268.4	10430.6	3450.4	13932.4	4326	12472.6	3918.6	8940	2675.2	6254.2	1591.8	17598.6	5831	-
Horse	Perissodactyla	15691.2	4518	58.4	-58	4917.6	1356.6	6823.4	2258.2	20231.6	6397.8	9801.8	3296.6	10251.8	3372	14183.6	4364.6	12528.4	3922.8	8721	2553	6674.4	1702.2	17510.4	5856.2	-
Horse	Perissodactyla	15182.4	4372.8	203.2	-24	4781	1380.8	6869.6	2294	20528.6	6493.4	9700.8	3224.4	10092.2	3315.8	13875.2	4334.4	12572	3987.2	8589.2	2581	6884.4	1740	17354.2	5826.6	-
Horse	Perissodactyla	16245	4717.6	-274.6	-198.2	4862.8	1357.2	6848.2	2302.6	21169.2	6808.4	9772.6	3317.4	10696	3553.2	15078.4	4727.6	13257.4	4169.8	8611.4	2622.8	6122.6	1655	18338.8	6182.6	Horse
Horse	Perissodactyla	15737.4	4570.6	-160.2	-44.6	4830.2	1383.4	6725.6	2268.8	20436.2	6540	9477.6	3218.6	10357.6	3445.8	14563.8	4577.2	12866.4	4085.2	8537.8	2600.4	6409.4	1728.2	17726.4	5969.8	Horse
Horse	Perissodactyla	14858.2	4305.8	-123.8	-97.8	4598.8	1277.8	6607	2174.4	19771.2	6425.4	9152	3134.2	9964	3333.2	14214.6	4461.2	12350.8	3928.6	8155.4	2493.2	6104.8	1526.2	17215	5827.8	Horse
Horse	Perissodactyla	15099.8	4377.2	-26.8	-139.4	4375	1258	6316.8	2135.6	19675.4	6327	9012.2	3086.2	10268.8	3425.4	14621	4865.4	12555.2	3982.4	8410.8	2521.2	6261.8	1685	17465	5875.6	Horse
Pig	Artiodactyla	22343.6	5911	370.2	15.4	5777.4	1500.2	15985.4	5394.4	26472.4	8576	15189	5231.2	10097.4	3397	13156.8	3994.2	11889.2	3700.8	14992.4	4500.4	9022.4	2654.8	13888	4341.2	-
Pig	Artiodactyla	21639	5684	741.2	136.2	6075	1662.4	16129.2	5336.4	26679.8	8715.2	15008.6	5212.4	9776.6	3297.8	12948.8	3970.8	11641.6	3620.2	14943.2	4431.2	8428	2496.4	13917	4316.8	-
Pig	Artiodactyla	20883.8	5459.8	469.8	61.2	5298.8	1530.6	15352.8	5123.4	25469.2	8277.4	14471.8	5049.4	9633.4	3202	12703.8	3923.8	11398.6	3566.2	14313.8	4258.6	8072	2461.8	13217.6	4146	-
Pig	Artiodactyla	20674.4	5421.6	425	40.6	4630.6	1204	15111.2	5088.4	25381.6	8262.8	14410.8	4988	9828.8	3274.6	12889.4	3996.2	11418.6	3562.6	14375.2	4268	8107.4	2416.6	12936	4131.4	-
Pig	Artiodactyla	20544.2	5397.2	404	86	5150.8	1409	14793	4988.8	24810.2	8095.8	14093.4	4890.8	9510	3187	12345.8	3809	11198.4	3492.8	14025.4	4187	7844.8	2418.8	12953	4073.2	-
Pig	Artiodactyla	20331.4	5319.2	668.4	77.6	5263.2	1439.6	14815.2	4969.6	25054.8	8196.8	14052.6	4904.4	9505.4	3163.2	12519.6	3816.8	11195.2	3482	13625.6	4097.8	7778.6	2334.8	12677.4	4018.6	-
Pig	Artiodactyla	21076.2	5691.8	198.8	-5.8	5288.8	1412.8	15669.4	5333.4	26237.6	8759.4	15360.8	5441.6	9896.8	3319.6	13310.4	4135.4	11687.8	3669.6	13958.8	4184.6	7408.8	2170.6	13476.8	4269.6	Pig
Pig	Artiodactyla	20893.6	5541.2	309.8	-7.6	4915.2	1393.8	15023	5160.4	25033.2	8298.8	14296	5030	9557.6	3283.6	12556	3918	11490.4	3632.8	13340	4078.8	7076	2159	13036.8	4153.4	Pig
Pig	Artiodactyla	20202.6	5364	328.6	41.6	4810.8	1348.6	14615.4	4965.4	24446.4	8096.4	13889.6	4838.6	9311.8	3122.8	12181	3827.4	11155.8	3501.8	13328.8	4021.4	6630.4	2098.2	12687	4026.6	Pig
Pig	Artiodactyla	20054	5305.4	367.8	-10.6	4798.8	1361.6	14668.6	5030.4	24473	8089.8	13786.2	4891.8	9671.4	3282.4	12153.8	3843.6	11246.4	3595.2	13196.6	3974.4	7567.2	2335.2	12645.2	4070.6	Pig
Bovine	Artiodactyla	15612.8	4409.8	-185	-170.4	4488	1261.2	11576.6	4088.2	23823	8337.6	14753.8	5344.8	9449	3161.6	12723.2	3927.6	10534.6	3397	23339.2	9634.2	6853.4	2688.4	27826.6	11767	-
Bovine	Artiodactyla	15292	4323.8	-49.6	-61.6	4526.6	1342.4	11528.6	4061.2	23687.6	8274	14585	5246.8	9576.6	3178.2	12646	3889.6	10475.6	3358.2	22991.2	9412	6500.8	2674.4	27240.4	11483.6	-
Bovine	Artiodactyla	14570	4095.4	57.4	-50.2	4166.4	1261.8	11078.8	3893	22873.4	8031.8	14086	5121	9248.4	3107.8	12325.2	3783.4	10176	3257.6	22258.6	9203	6442	2539	26129.4	11145.2	-
Bovine	Artiodactyla	14198.2	3985.8	-299.8	-101.6	3347.6	957.2	11077.4	3896.6	22939	7978.8	13880.4	5069.6	9213.8	3071.4	11672.8	3637	10009.4	3231	22413.8	9253.8	6370.8	2613.6	25586.6	10885.8	-
Bovine	Artiodactyla	14223.4	3945.2	-146.6	-81.6	3683.8	1097.6	10677.4	3734.4	22041.4	7746	13573.2	4927.8	9219.6	3053.2	12022	3744.4	9986.2	3202.4	21691.4	8836.2	6230.2	2550.4	25462.4	10841.4	-
Bovine	Artiodactyla	13756.6	3855.6	241.6	-52.8	3925.8	1180.8	10627.6	3744.6	22223	7778.6	13595.4	4878	9002.4	2969	12174.8	3777.6	10036.8	3190.8	21658	8958.2	6165.4	2468.8	25626.2	10773.4	-
Bovine	Artiodactyla	14853.2	4199.8	-354	-262.8	4186.4	1271	11084.2	3955.6	23278.4	8213.4	14197.8	5221.6	9659.4	3262.6	12771.6	3972.6	10539.4	3391	22098	9224.2	5880.6	2507.8	27074.8	11566.2	Bovine
Bovine	Artiodactyla	13910	3923.4	-259.8	-161.4	3825.2	1170	10823.4	3815	22374.6	7915.4	13771	5061.2	9489.8	3176.6	12427	3932.2	10211	3301	21669.8	9116.6	6064.4	2485.4	26036	11218.8	Bovine
Bovine	Artiodactyla	13508.2	3832	9.4	-109	3713	1105	10410.2	3690.2	21695	7663.6	13177	4878	8990.6	3037.2	12006.8	3812.8	9920	3191	20995.4	8805.6	6063	2520.2	25075.8	10852.4	Bovine
Bovine	Artiodactyla	13490.2	3822.6	-151	-118.4	3585.8	1095	10285.6	3680.6	21794.8	7636.6	13398.8	4872.2	8974.2	3002.6	11940.6	3769.4	10157.6	3298.2	20953	8807	5880	2516	24990.2	10793.8	Bovine
Rabbit	Lagomorpha	40209	14026.8	-430.2	-294	4891.8	1359.2	13779.2	4331.4	24339.6	7460.6	11996	3840.2	10117.2	3311.8	12157	3829	11162.2	3497.6	12090.4	3313	4205.6	722.6	12828	3905	-
Rabbit	Lagomorpha	40228.4	14041.8	-379	-258	5675.6	1544.2	14007	4308	24455.4	7357.4	11753.4	3853.2	10086	3299.6	12169.2	3749.6	10989.6	3465.4	11770.8	3202.2	4068	596	12849.8	3957	-
Rabbit	Lagomorpha	38245.4	13327.8	-340.4	-164.8	4626.6	1299.2	13514.4	4266.2	23826.6	7225	11371.6	3719	9858	3209.6	11813.6	3676.4	10868.6	3385.4	11553	3196	4122	703.6	12172.8	3734	-
Rabbit	Lagomorpha	37734.8	13018	-468.6	-225.4	4254.6	1207.2	13049.4	4080.4	23438	7108	11369.4	3700.6	9855.6	3188.4	11510	3610.2	10652.2	3375.2	11302.4	3112.6	4135.4	705.2	11916.4	3658.6	-
Rabbit	Lagomorpha	37358.2	12970.2	-249	-189.6	4565.8	1276.8	12828.2	4039	22861.2	6965.4	11144.8	3674.4	9705.4	3184.6	11673.4	3673.2	10462.6	3332	11105.2	3073.8	4298.4	769.2	11836.2	3609	-
Rabbit	Lagomorpha	36789.4	12754.2	54	-75	5065.8	1454.2	12759.6	4026.8	27843	9268	11163	3597.4	9704	3166.2	11554.6	3600.6	10634.4	3381	11067.4	3049.8	4511.2	885.2	11838	3633.8	-
Rabbit	Lagomorpha	39070.6	13783.8	-646.2	-295.2	4831.6	1393.2	13712.4	4317	24140.4	7456.4	11685.4	3856	10214.8	3395.2	12258.6	3832.6	11131.8	3588.8	11229	3120.4	3752.8	572.2	12543.6	3859	Rabbit
Rabbit	Lagomorpha	37460.2	13265.2	-266.4	-181.4	4840.8	1416.4	12932.8	4130.4	23183.2	7118.2	11331.2	3743.2	9907.2	3311.6	11901.8	3747	10730.2	3441.6	10844.8	3030.4	3889.2	724.4	12130.6	3764.6	Rabbit
Rabbit	Lagomorpha	36874	12869	-256.6	-225.4	4435.2	1293.2	12985.8	4091.8	22707.8	6981.4	10807.8	3602.4	9679.2	3245.8	11438	3673.8	10541.4	3354.6	10707	2972	4141.6	750.8	11799.2	3682.8	Rabbit
Rabbit	Lagomorpha	36497.4	12766.4	-354.4	-140.6	4751	1380	12428.8	3952.4	22465.4	6882.8	11079	3673.8	10206.8	3387.6	11516	3654.4	10474	3399.6	10540.2	2947.2	4201.2	722.6	11876.8	3697.6	Rabbit
Mouse	Rodentia	17504.4	4266	-3731.4	-1171.2	1268	259.6	6406.4	2090.8	16027.8	5033.8	7484.8	2611.8	11192.4	3671.8	13251.2	4097	11491.4	3620.4	11089.2	2893.4	4565.4	628.6	18470	5306.2	-
Mouse	Rodentia	17786.2	4264	-3522.4	-1108.8	1342.2	336.2	6329.4	2096.4	15920.8	4987.6	7305.6	2550.2	11000.8	3580.8	13196	4102.6	11542.8	3646.2	10766.2	2785.6	4027.4	457.8	18233	5199.6	-
Mouse	Rodentia	16754.6	4131.4	-2705.8	-873.4	1637	477.6	6194.6	2070.8	15497	4884.2	7095	2491.6	10906.2	3537.6	13173.6	4052.2	11400.6	3556.8	10816.6	2853	4441.4	648	17697.8	5047.6	-
Mouse	Rodentia	16699.4	4118.4	-2421.6	-786.6	1371.6	351.2	6191.8	2067.2	15719	4974.8	7173.2	2484.6	10948.4	3590.4	12715.2	3936.2	11211.2	3474.2	10959.8	2871.6	3931.8	508.2	17388.6	5003.4	-
Mouse	Rodentia	16495	4069.6	-2410.2	-781.4	1842.6	499.2	6036.2	2030.6	15073.8	4742.8	7061.8	2456	10787.8	3535.8	12798.4	3981	11186	3514.8	10699.4	2778	4052.6	551.8	17243.2	5002	-
Mouse	Rodentia	16079.6	3956	-2322.6	-711.4	1870.4	516.6	6103.4	2027.4	15079	4760.2	6903.8	2423	10635.8	3524	12677.6	3941.6	10971.4	3467	10476.2	2743	4297.2	622.6	16812.2	4854.8	-
Mouse	Rodentia	16930.4	4213	-2537.6	-777.2	1662.6	518.2	6284.6	2113.6	15781.2	5021.2	7196.6	2561.6	11099.2	3677.8	13220.6	4143	11668.4	3728.8	10311.6	2757.8	3621.6	364.8	17869.2	5235.6	Mouse
Mouse	Rodentia	16198.6	4040.4	-2234.4	-778.6	1852.6	477.8	6105	2062.6	15105	4796.6	7003.8	2495.8	10907.8	3590	13127.8	4150.4	11221.2	3575.6	10234.6	2683.6	4114.6	587.6	17409.2	5083.2	Mouse
Mouse	Rodentia	16147.8	4034.6	-1982.4	-694	1867.6	542.4	6034.2	2032.2	14702	4697	6860.6	2419	10662.4	3519	12704.6	3995.8	10850	3461.4	10343.4	2730.2	4031.4	637	16991.4	4959.6	Mouse
Mouse	Rodentia	15880.4	3911.4	-2294.8	-726.8	1906.2	514	6033.2	2059.6	14629.2	4691.8	6996.2	2486.2	10676	3548.2	12949.6	4076.4	11060	3517.4	10264.4	2743.6	4172.6	594.8	17047.4	5059.4	Mouse
Sheep	Artiodactyla	14254	4375.6	-1758	-667.4	4102	1150	8693.6	3068.6	19894.2	6618.6	10726.6	3906.8	9412.8	3144.2	12113.2	3777.8	10796.2	3464.4	12551.6	3835.2	4925	1449.4	18713.8	6058.6	-
Sheep	Artiodactyla	14014.2	4336.4	-1848.4	-607.6	4137.2	1181.8	8688.6	3103.2	19784.4	6608.4	10580	3844.8	9324	3121.6	12286.2	3846.6	10491.6	3339	11885	3548	4816.8	1531.4	18321	5902.2	-
Sheep	Artiodactyla	13323.2	4109.4	-1486	-539.2	3801.8	1122.8	8149.8	2940.2	19070.2	6387.8	10203.6	3711.4	9238.8	3093.4	11884.6	3740.6	10518	3404	11634.8	3585.8	4568.4	1511.2	17624.6	5735	-
Sheep	Artiodactyla	13432	4123.6	-1300.2	-457.2	3285.6	943.8	8172.4	2907	19264.8	6430.6	10267.8	3754.8	9121.4	3074.6	11509.4	3618.6	10245.8	3309	11627.6	3593.4	4229.8	1376	17554.6	5662	-
Sheep	Artiodactyla	13195.2	4071.2	-1372.4	-496.2	3687.4	1083	7929.8	2816.6	18402.8	6114.4	9978.8	3665.8	9089.4	3022.4	11737.4	3685.4	10188.8	3273.8	11634.2	3572.8	4490.8	1363	17153.8	5590	-
Sheep	Artiodactyla	12775.8	3931.8	-1281.4	-414.4	3802.2	1132	7919.2	2864.2	18857.8	6300.2	9940.6	3663.4	8896	2982.8	11720	3679.8	10173.6	3253.8	11240.6	3464.6	4570.4	1483	17126.8	5562.4	-
Sheep	Artiodactyla	13370.4	4144.4	-2493.4	-841.8	3596.8	1038.8	8186.4	2953.6	19497.4	6596.6	10376.8	3786.4	9489.2	3193.4	12315.4	3887.6	10649.2	3503.6	11437	3540.6	4131.8	1297.2	18041	5966	Sheep
Sheep	Artiodactyla	12881.6	4021.8	-1535.8	-515.4	3610	1054.4	8160	2929.8	18769	6348.8	10054.8	3721.6	9185.4	3110.4	11898.4	3808.4	10333.6	3346.2	11196.6	3472	4046.8	1341.8	17107	5640	Sheep
Sheep	Artiodactyla	12433.6	3880.4	-1374.6	-492.2	3522	1062	7811	2816.6	17800.2	6051.2	9690.2	3577	9013	3064.6	11563.6	3724.8	10097	3278	11125.4	3406.4	4224.2	1329	16746.6	5529.2	Sheep
Sheep	Artiodactyla	12493.6	3899.2	-1278.2	-481.2	3459.8	1035.4	7801	2839.4	18177.2	6222	9771	3604.4	8961	3038.8	11888.8	3766	10167.2	3313.6	11386	3497.2	4563	1415.2	16826.2	5525.4	Sheep
Guinea pig	Rodentia	15495.8	5391.6	203.2	-8.4	5215.8	1748.4	9810.4	3092.2	21551	6014	9268.8	3095.2	13017.2	4597.2	14592	4549.6	12890.4	4126.4	10699	3156.2	6792	1362.6	15848	5081	-
Guinea pig	Rodentia	15791.4	5484	449.4	142.2	5401.2	1809	9700.2	3050.2	21024.8	5865.8	9150.4	3032.8	12782.2	4500.4	14573.4	4577	12559.4	4021.4	10288	3070.2	6637.6	1302	15512.4	4951.6	-
Guinea pig	Rodentia	14746.2	5169.8	405.2	45.8	4969.6	1691.4	9422.2	2990.2	20334.6	5713.8	8758.2	2918.6	12696.2	4454.8	14178	4508	12267.4	3928.2	10036.8	3021.2	6809.6	1368.2	14968.2	4757.8	-
Guinea pig	Rodentia	14773.8	5144.2	118	46.2	4166.6	1397.2	9397.8	3004.2	20248	5681.8	8704.6	2914	12545.4	4385.2	13567.6	4284.6	11936	3826.2	9972.8	2952	6961	1311.2	14572.8	4691.4	-
Guinea pig	Rodentia	14202.4	4900.4	402.8	119.6	4911.4	1677	9192.2	2909.2	19725.6	5543	8555.2	2906.4	12386	4384.4	13874.4	4392.6	11992	3886	9743.8	2890.8	6077.8	1181	14451.6	4674	-
Guinea pig	Rodentia	13979.6	4876.8	742	190.2	4906.8	1658.6	9191.8	2924	19753.2	5562.4	8620.2	2879.8	12438	4350	14022.4	4422.4	11866.6	3851.6	9573.2	2832.4	6675	1350.8	14310.6	4610.4	-
Guinea pig	Rodentia	15086	5278	-127.4	-49.6	4721.8	1589.6	9598.6	3066.6	20865.6	5887	8984	3022.8	13097.2	4653	14780.8	4716.6	12625.2	4105.8	9682.6	2910	5982.6	1138.8	15321.6	5024.8	Guinea pig
Guinea pig	Rodentia	14190.8	5031.6	143	37.4	4850.4	1671.6	9184.2	2948.4	20058.4	5656	8597.6	2954.8	12669.8	4546.6	14116.8	4492.4	12222.8	3969.4	9275	2828	6567	1265.2	14669.6	4744.8	Guinea pig
Guinea pig	Rodentia	13819.6	4900.6	241.6	51.4	4694.2	1629.6	8933.8	2840	19120.4	5399.8	8480.4	2887.4	12346.8	4376	13873	4412.4	11811	3853	9221	2795.6	5894.2	1129.2	14358.4	4623	Guinea pig
Guinea pig	Rodentia	14490.4	5129.8	444.6	143.4	4654.4	1584.6	9109.8	2924.8	19756	5570.2	8484.4	2875	12417.4	4402	13973.6	4474	11949.4	3886.8	9141.2	2786.6	6005.6	1109.6	13795.6	4508.4	Guinea pig

## Sheet: Dataset S2
Dataset S2. Data set matrix of the differences in fluorescence intensity before and after the addition of albumin-depleted or non-depleted animal sera (0.10 vol%) to the AIE-polymers.
Analytes		pH = 5.0
		P-None		P-Phe		P-Nle		P-Suc		P-Pht		P-Pyr
		Ch1	Ch2	Ch1	Ch2	Ch1	Ch2	Ch1	Ch2	Ch1	Ch2	Ch1	Ch2
Depleted	Human	3709.4	1160.2	5184.4	1559.2	4298	1263	3871.6	1170.8	2596.2	599.8	7511.2	2330.6
	Human	3651	1189	4937.4	1535.2	4400.2	1372.4	3911.4	1096	2668.8	627.8	7436.2	2337.4
	Human	3599.4	1159.4	5013.4	1516.6	4142.2	1295.4	3433.6	992	2087.2	457	7120.8	2282
	Human	3553.4	1142.2	4813.2	1472.4	4290.4	1277	3705.6	1070.2	2321.2	654	7162.8	2186.2
	Human	3536	1143.8	4782.4	1462.6	4308.2	1260	3604.4	1079.2	2317.8	524	7171.4	2236
	Human	3436	1114.4	4758.2	1467	4214.8	1263.8	3507	1028.4	2400.2	511.6	7144.8	2200.6
	Sheep	3099.2	1021.8	3972.2	1193.8	3425.4	1023	2493.6	701.6	1288.8	373.6	6197	1905.2
	Sheep	2983	940.2	3941.6	1198.4	3411.6	1100.6	2444.8	732.8	1480.2	330.8	5953	1875
	Sheep	2894.4	953.4	3801.4	1168.8	3405.2	1104	2367.6	699.4	1340.8	330.2	5920	1829.4
	Sheep	2880	915	3506.4	1082.6	3085.4	1019.8	2302.4	669	1035	210.4	5857.8	1746.6
	Sheep	2920.2	920	3558.4	1104.6	3147	982.4	2283.8	669.8	1099.6	213.6	5945.8	1895.6
	Sheep	2955	961.6	3445.6	1073.2	2996.8	961.8	2225	671.2	1012.4	275.8	5929.6	1863.8
	Bovine	3379.8	1058.4	4398	1298.4	3748.4	1170.8	3517.8	1283.4	1426.4	367.4	6542	2023.4
	Bovine	3266	1041	4324.4	1261.8	3575.2	1094.2	3878.2	1283.2	1428.6	388.4	6958.8	2238.8
	Bovine	3135.8	974	4320.6	1271	3279.4	983.6	3686.8	1241.2	1285	284	6344.6	2028.4
	Bovine	2907.4	924.4	3988.6	1267.6	3658	1140	3457	1171.8	1385.6	318	6359	1986.4
	Bovine	2783.6	890.6	3930.2	1197.2	3539.2	1096.2	3444.2	1194.8	1139.2	240.8	6402.4	2037.2
	Bovine	2772.8	861.8	4072.8	1209.2	3545.8	1056	3338.6	1187.8	1148.8	237.6	6293.6	2015.6
	Mouse	4355	1446.8	5486.2	1575.8	5299.6	1614.2	4490	1224.8	870.2	129.4	7581.2	2346.4
	Mouse	4381.4	1428	5181	1542.4	5132.6	1598	4221	1140	1013.8	204.4	7457.2	2242.4
	Mouse	4542.2	1412.2	5186.6	1527.6	4950.8	1466.6	4058.4	1118.6	793.4	199.2	7125.2	2112
	Mouse	4254	1323.6	5143.2	1551.6	4789	1469.8	3967.4	1062.2	1110.8	270	7177.4	2176
	Mouse	4118.4	1326.4	5296.8	1558.8	4727.2	1464	3542.2	987.2	1170	179.8	7493.4	2253.4
	Mouse	4588	1524.4	4603	1380.8	4699.6	1358.2	3738.2	1051.2	1187.8	188.2	7179.4	2177
	Goat	3687.4	1206.4	4980	1519.8	3624.2	1184	2725.8	864.8	1763.8	453	6810.4	2123
	Goat	3587.8	1240.8	4938.6	1553.4	3727.6	1173.8	2892.2	836.2	1646.2	411.6	6743.6	2126.8
	Goat	3533.2	1144	4699	1462.2	3753.4	1141.6	2554.8	752.6	1385.4	436.6	6319.8	2016.4
	Goat	3270	1120.2	4436.4	1378.8	3916.6	1191.6	2283.4	714.6	1407.4	410.2	6747.6	2055.2
	Goat	3351	1123.2	4384.8	1343.8	3885.2	1174.2	2747.2	738.6	1481.2	399	6778.4	2042.2
	Goat	3231	1136.4	4662.6	1439	3703	1136.4	2383.8	739.8	1455.8	391.8	6674.6	2063.6
	Rat	4467.6	1507.8	5921.4	1750.2	5289.4	1594	4200.4	1151.4	1155.4	172.8	7743.4	2366.8
	Rat	4442.4	1432.2	5840.8	1723.8	5166.8	1520.2	3975.4	1079.8	1407.2	315.6	7569.6	2279.4
	Rat	4229.4	1416.2	5518.4	1712.4	4753	1503.2	3828.2	1058.4	1144	240.2	7296	2267.8
	Rat	4351	1434.6	5166.2	1563.4	4946.4	1529.6	3930.6	1137.8	1265.6	281.8	7650.8	2279
	Rat	4389	1397.4	5265.6	1546.6	4804.6	1485	3958.8	1087.2	1198	221.6	7505.6	2336.6
	Rat	4254.8	1399.4	5334.8	1575.4	4763.4	1423	3900.2	1105.6	1079.6	289.2	7472.8	2302.8
Non-depleted	Human	4626.4	1453.6	6630.8	1900.2	5725.2	1722.2	5589.6	1597.8	3781.8	934.8	6873.4	2271.2
	Human	5362.6	1655.6	7330.6	2158.2	6446.4	1867	6426	1813.6	3705.6	908.2	7681.4	2515.6
	Human	4199	1306.8	6296.8	1813	5694.2	1715.6	5454.4	1591.6	3489.8	940	6772.2	2183.8
	Human	5244.8	1702.4	7095.4	2093.8	6317	1852	6076.8	1798.6	3839.2	1006.4	7536	2508.8
	Human	4448.4	1358.2	6100.8	1755.2	5503.4	1678.6	5496.8	1518.2	3597.8	911.2	6612.6	2184
	Human	4879	1483.4	6281.2	1910.8	6067.4	1755.6	5558.6	1594	3360.2	891.8	6841.6	2249
	Sheep	4056.4	1293.4	6065.2	1867.2	5195.2	1587.2	6550.4	1928	2763.2	863.8	8072.6	2476.2
	Sheep	4286.2	1320.6	6512.4	1861.4	4735.2	1451.6	6023.4	1767.8	2346.4	598.6	8383.6	2555.4
	Sheep	3814	1225.8	6269.2	1787	4711.6	1424.4	6199.8	1782	2611.4	742	7680	2305.6
	Sheep	4155.2	1295.6	6269	1839.8	4822.6	1420.4	5893.6	1709.2	2358.6	715.4	8377.2	2534.2
	Sheep	3549.8	1081.2	5585	1658.2	4350	1297	5759.8	1678.6	2157.4	620.4	8229	2451.6
	Sheep	3956.2	1261.4	5692.4	1680.8	4865.8	1434.4	5548.2	1553.4	2455.6	763.8	8156.6	2481
	Bovine	4044.4	1250.8	5901	1726	5175	1542.8	10612	4147.4	2896.6	1102.6	12469	4960.8
	Bovine	3913.4	1227.2	6230.6	1809.4	5436.2	1591.4	11356	4421.4	2690.4	891.4	13682.4	5362
	Bovine	3871	1193	5834.6	1668	5308	1611.8	10183.4	3908.6	2809	909.4	12011.6	4828.6
	Bovine	3918.6	1202.2	6204.8	1817.2	5256.8	1588.4	11158.2	4250.2	2612	911.8	13415.2	5375
	Bovine	3482	1065.8	5235	1539.6	4592.8	1358.2	9343.2	3542.2	2544.4	929.2	11420.4	4538
	Bovine	3616.4	1138.2	5561.8	1655.6	4732.2	1347.4	9786	3689.8	2330.6	811.4	11888	4750.8
	Mouse	5555.6	1689.4	7562	2186.6	6731.2	1971.2	5945.8	1485.4	3172.8	706.6	9775	2555.8
	Mouse	5262.8	1568	7532.6	2189.4	6522.4	1904	5252.6	1332.2	3113.8	611.4	8888.2	2380.8
	Mouse	5525.2	1693.8	7539.6	2125	6427.8	1864.8	5853.2	1445.8	3075.2	692.8	9618	2585.8
	Mouse	5175	1554.8	7174	2030.8	6357	1843.8	5211.6	1354.6	2670.6	576.8	8862.6	2366.4
	Mouse	4985.2	1515.6	6550.4	1849.4	5479.8	1642	4939.2	1280	2886.4	650.2	8805.4	2338.4
	Mouse	5045.4	1538.2	6602.6	1916.6	5945.4	1753.4	5199.4	1296.2	2633.8	554.6	7760	2149.2
	Goat	4521.8	1478.8	6635.2	2015.6	6001.6	1841.8	7121	2047.6	2338.2	745.8	8911.4	2730.6
	Goat	4642.6	1460.2	6479.6	1972.2	5480.4	1683.8	6531.4	1921.8	2042.4	663.6	8096.8	2500.4
	Goat	4759.4	1507.8	6231	1930	5849.2	1789	6997.2	2040.2	2175.4	753.6	8464.8	2631.8
	Goat	4469.4	1468	6881.2	2093.8	5154.6	1573.8	6474.4	1933.8	2263.4	713	8239	2449.4
	Goat	4189.4	1371.6	6041.8	1832.2	4920.8	1505.4	5460.6	1684.2	1942.4	714.6	7712.4	2349.6
	Goat	4161	1345.4	5393.4	1626.2	4903.8	1497.6	5920.2	1703.2	2245.4	721	7269.6	2209.2
	Rat	6011.8	1837	8354.4	2450.4	6155.8	1799.4	6530.6	1820	3570.4	700	8135.4	2331.6
	Rat	6200.4	1912.8	8279.6	2396.8	7086.2	2102.4	6436.8	1702	3272	587.2	9739.6	2655.8
	Rat	5798.2	1800.2	8161.6	2314.2	5883.8	1731.2	6263.6	1683.4	3322.6	696	7691.4	2127.4
	Rat	6203.4	1928.8	8232.4	2451.4	6876.6	1984.4	6398.2	1784.2	3211.8	700.8	9315.2	2598.8
	Rat	5425.8	1672	6980	2036.8	5794.4	1759	5531.6	1551.2	2464.8	487.8	8447	2372.4
	Rat	5271.6	1695.4	7318.8	2190.6	6287	1940.8	5738.6	1600	3166.2	615.2	8311.8	2272.6

## Sheet: Dataset S3
Dataset S3. Data set matrix of the differences in fluorescence intensity before and after the addition of animal sera (0.10 vol%) to the AIE-polymers in two independent experimental batches (Ex1 and Ex2). The rightmost column indicates whether the data in the corresponding row was used as training data (denoted by “–”) or test data (results of the verification are shown) in the holdout validation.
Analytes		pH = 5.0												Verification by Holdout test
		P-None		P-Phe		P-Nle		P-Suc		P-Pht		P-Pyr
		Ch1	Ch2	Ch1	Ch2	Ch1	Ch2	Ch1	Ch2	Ch1	Ch2	Ch1	Ch2
Ex1	Bovine	3740.4	1181.8	5434.6	1593.8	4443.2	1285	9478.8	3688.6	2957.6	991.6	11485.2	4572.6	-
	Bovine	3521.8	1084.6	5373	1663.2	4839.4	1435.8	9606.2	3756.8	2492	840.2	11295.2	4570.6	-
	Bovine	3856.6	1188.6	5635.8	1668.8	4571.6	1389.2	10058.6	3937.4	2949.4	1043.4	12401.4	4820.2	-
	Bovine	4032.6	1257.8	6007.2	1725.8	4981.4	1461.8	10571.6	4158.6	2930.2	999.6	12904.2	5181.8	-
	Bovine	3712.4	1123.8	5334.6	1579.6	4687.8	1400.8	9686.6	3680.6	2928.8	984.8	11882	4809.8	-
	Bovine	3902.8	1169.2	5692.8	1671.2	4937.8	1503.6	10290.6	3960	3076.2	1019.2	12308.2	4940.2	-
	Chicken	3822.6	1133.4	5172.8	1378.2	4534	1280.4	4217	1168.2	1044.2	263	6282	1928.2	-
	Chicken	3800.2	1112.8	4848.2	1308.6	4349	1196.8	4042.2	1112	647.4	110.4	6284.4	1953	-
	Chicken	4317.6	1203.6	5187.8	1403	4425	1271.4	4681.8	1324.4	944.2	275.6	6830.4	2043.6	-
	Chicken	4210.6	1169.4	5069.4	1396	4507.4	1256.6	4537.6	1194.2	685	163	6759.4	2106.4	-
	Chicken	4188	1202	5073.4	1418.4	4488.6	1287	4403.8	1164.4	733.6	240.6	6345	1953.2	-
	Chicken	3972	1100.8	4839.8	1305.6	4476.2	1325.4	4098.2	1148.2	591.6	132.8	6509.2	2043.8	-
	Goat	4326.6	1442	5677.2	1726	5215.2	1616.6	6136.6	1774.8	2596.2	806.6	7770	2377.6	-
	Goat	4312.8	1391	5781.4	1734.8	5522.4	1653.4	6175.8	1864.8	1974.6	648.4	8216.8	2510.6	-
	Goat	4664.6	1443.8	6748.4	2039	5331	1709.8	6063.2	1766.4	2642	846.4	8836.6	2720.4	-
	Goat	4723.8	1463.4	5866.2	1780.8	5261.4	1621	6736.8	1972.2	3001.6	895	8163	2457.2	-
	Goat	4424.6	1445.4	6517.8	1981.6	5232	1592.6	5686.8	1686.6	2166.2	783	8437.2	2561.8	-
	Goat	4492.6	1422.4	5528	1690.2	5283.2	1660.6	6438.2	1976.4	2523.6	794.6	7658.2	2368	-
	Horse	4436.4	1315.2	6929.8	2043.2	6068.2	1753.6	4527.6	1243.8	3378	896	8213.2	2572.8	-
	Horse	4399.6	1295.4	6683.2	1934.6	6030.8	1756.8	4228.6	1266	3488.4	907.8	7528.6	2371.4	-
	Horse	4967	1540.6	7502.8	2151.6	6454.4	1876.4	4769.8	1405.6	3531.2	1002.4	8692.4	2758.2	-
	Horse	4480.4	1426.6	7063	2061	6163.8	1807.8	4902.4	1454.4	4100	1027.6	8817.4	2797.2	-
	Horse	4615.6	1410.2	7120.2	2118	6475.8	1912.4	4652.8	1332.8	3347.4	916	8575.8	2695.2	-
	Horse	4480.2	1402	6777	2014.2	6112.6	1803.4	4700.4	1393	3830.8	996.8	8433	2660.2	-
	Human	4423	1364.6	6189.2	1855.2	5452.4	1600.4	5566.4	1566.4	3982.8	1056.8	6883	2181.8	-
	Human	4814.8	1481	6463.2	1940.4	5712.8	1670	5523.4	1548.4	3430.8	849.2	6745.4	2169.8	-
	Human	4983.6	1499.4	6932	2012.4	5971.8	1731.6	6010.6	1759.4	3918	1035	7258.8	2461.2	-
	Human	5273.6	1584	6889	2107.4	6327.2	1803.8	6070.6	1794	4219.4	1130.2	7296.4	2359.4	-
	Human	4521.6	1437.8	6399.2	1922	5732.4	1765.8	5805.2	1724.2	4096.8	1003.8	6953.8	2252.2	-
	Human	4967	1499	6962.2	2108	5931.4	1684.6	5916.2	1684.4	3819.4	930.6	7165.2	2291	-
	Mouse	5098.2	1556.8	6668.4	1935.2	5827.8	1753.4	5179.4	1338.4	2857.6	545	8590	2362	-
	Mouse	4790.4	1440	6279.4	1886.6	5808.4	1692.8	5287.4	1278.4	2532.4	577.8	8655	2245.2	-
	Mouse	5393	1646.2	7345.2	2089	5965.8	1775.4	5756.8	1469.2	3267.8	702	9476.8	2539.4	-
	Mouse	5483.8	1712.4	7459.8	2125.2	6411.4	1831.2	5786.2	1443	3462.2	716.4	8306.8	2207.8	-
	Mouse	5261.4	1559.8	7230	2056.2	5849.8	1700.8	5293.8	1346	2931.8	653	9052.6	2401.4	-
	Mouse	5280.4	1537.2	7084.2	2027	6318.8	1829.2	5473.6	1394.2	2809.6	613.8	8385.6	2207.4	-
	Rat	5369.2	1761.4	7435.4	2147.8	5595.6	1675.6	5730.8	1497.2	3013.8	551.4	6955.4	1922.4	-
	Rat	5563.2	1761	7231.4	2130.6	6264.8	1876.2	5755.6	1560.2	3276.2	613.2	8464	2376.2	-
	Rat	6041.6	1846	7789	2282.2	6193	1835.2	6134.2	1617.4	3434.8	753.6	9213	2626.2	-
	Rat	5796.4	1828.8	7913	2371.2	6734.2	1937.4	6491.4	1752	3797.6	754.4	9158.8	2549	-
	Rat	5693.4	1755.6	7688.8	2163	6452	1873.4	5899.4	1631.6	2756.2	558.4	8787	2455.8	-
	Rat	5767.2	1807.4	7538.6	2245.2	6700.4	1964.8	6217.2	1632	3773.6	836.6	8578.6	2405.2	-
	Sheep	3555.2	1088.4	5464.6	1545.2	4492.6	1329.8	5738	1635.8	2889.2	831.2	7013	2199	-
	Sheep	3896.2	1172	5641.2	1597	4345.8	1303.8	5405	1559.4	2557	708.6	7594.6	2310.8	-
	Sheep	3825.6	1144.2	6205.2	1844	4468.6	1366.4	6297.4	1878.8	2499.6	762.8	8871.6	2642.8	-
	Sheep	4389.4	1360.6	6197.4	1834.2	5087	1511.6	6290.8	1841.6	3044	845	8932.2	2688	-
	Sheep	3638.4	1134.8	6029.8	1775.2	4548.8	1323.6	6161	1809.2	2954.4	797.2	8116.6	2385.2	-
	Sheep	4072.4	1246.6	6009.4	1747	5133	1546.6	6030.8	1715.8	2648	781.4	8592	2586.2	-
Ex2	Bovine	4044.4	1250.8	5901	1726	5175	1542.8	10612	4147.4	2896.6	1102.6	12469	4960.8	Bovine
	Bovine	3913.4	1227.2	6230.6	1809.4	5436.2	1591.4	11356	4421.4	2690.4	891.4	13682.4	5362	Bovine
	Bovine	3871	1193	5834.6	1668	5308	1611.8	10183.4	3908.6	2809	909.4	12011.6	4828.6	Bovine
	Bovine	3918.6	1202.2	6204.8	1817.2	5256.8	1588.4	11158.2	4250.2	2612	911.8	13415.2	5375	Bovine
	Bovine	3482	1065.8	5235	1539.6	4592.8	1358.2	9343.2	3542.2	2544.4	929.2	11420.4	4538	Bovine
	Bovine	3616.4	1138.2	5561.8	1655.6	4732.2	1347.4	9786	3689.8	2330.6	811.4	11888	4750.8	Bovine
	Chicken	4243.8	1229.8	5609.8	1651.4	5003.4	1337.4	4898.6	1413.8	1170	274.8	7271.4	2190.4	Chicken
	Chicken	4038.2	1158.8	5329.8	1435.8	4704.4	1330.4	4254.2	1164.8	561.4	114.8	6871.2	2102.6	Chicken
	Chicken	4270.6	1215.2	5783.6	1536	5138.4	1479	4714.2	1263.8	786.6	188.4	6900.2	2131.6	Chicken
	Chicken	4217.2	1222.6	5080.6	1387	4694.2	1332	4136.4	1188.2	416.4	36.6	6571.2	2013.6	Chicken
	Chicken	3933.4	1149.6	4850.6	1362.2	4202.4	1197	4022.2	1175	682.2	103.4	6306	1892.2	Chicken
	Chicken	3828.2	1101.2	4704.2	1314.8	4313	1241.6	3983	1151.4	630.6	153.6	6340.6	1971.8	Chicken
	Goat	4521.8	1478.8	6635.2	2015.6	6001.6	1841.8	7121	2047.6	2338.2	745.8	8911.4	2730.6	Goat
	Goat	4642.6	1460.2	6479.6	1972.2	5480.4	1683.8	6531.4	1921.8	2042.4	663.6	8096.8	2500.4	Goat
	Goat	4759.4	1507.8	6231	1930	5849.2	1789	6997.2	2040.2	2175.4	753.6	8464.8	2631.8	Goat
	Goat	4469.4	1468	6881.2	2093.8	5154.6	1573.8	6474.4	1933.8	2263.4	713	8239	2449.4	Goat
	Goat	4189.4	1371.6	6041.8	1832.2	4920.8	1505.4	5460.6	1684.2	1942.4	714.6	7712.4	2349.6	Goat
	Goat	4161	1345.4	5393.4	1626.2	4903.8	1497.6	5920.2	1703.2	2245.4	721	7269.6	2209.2	Goat
	Horse	4881.6	1466.2	8049.2	2313.8	6888.4	1977.2	4958.2	1414.4	3903.8	1043	9547	3019	Horse
	Horse	4681.8	1460.2	7238.4	2087	6263.8	1840.8	4751.6	1369.8	3485.4	888	8383.8	2652.4	Horse
	Horse	4826.2	1397.4	7925.8	2258.2	6687	1977.2	5014.6	1416	3674.4	970.8	9413	2866.8	Horse
	Horse	4598	1420	7286.6	2068.6	5756.8	1736.2	4485.6	1227.8	3494	891	8375.4	2629.6	Horse
	Horse	4497.6	1364.4	6833.6	1997	6005	1772	4377.8	1227.4	3220.4	866.2	8231	2508.2	Horse
	Horse	4393.2	1326.2	6517	1890.8	5893.4	1692.4	4372.4	1199.4	3447.2	863.6	8095.6	2612.2	Horse
	Human	4626.4	1453.6	6630.8	1900.2	5725.2	1722.2	5589.6	1597.8	3781.8	934.8	6873.4	2271.2	Human
	Human	5362.6	1655.6	7330.6	2158.2	6446.4	1867	6426	1813.6	3705.6	908.2	7681.4	2515.6	Human
	Human	4199	1306.8	6296.8	1813	5694.2	1715.6	5454.4	1591.6	3489.8	940	6772.2	2183.8	Human
	Human	5244.8	1702.4	7095.4	2093.8	6317	1852	6076.8	1798.6	3839.2	1006.4	7536	2508.8	Human
	Human	4448.4	1358.2	6100.8	1755.2	5503.4	1678.6	5496.8	1518.2	3597.8	911.2	6612.6	2184	Human
	Human	4879	1483.4	6281.2	1910.8	6067.4	1755.6	5558.6	1594	3360.2	891.8	6841.6	2249	Human
	Mouse	5555.6	1689.4	7562	2186.6	6731.2	1971.2	5945.8	1485.4	3172.8	706.6	9775	2555.8	Mouse
	Mouse	5262.8	1568	7532.6	2189.4	6522.4	1904	5252.6	1332.2	3113.8	611.4	8888.2	2380.8	Mouse
	Mouse	5525.2	1693.8	7539.6	2125	6427.8	1864.8	5853.2	1445.8	3075.2	692.8	9618	2585.8	Mouse
	Mouse	5175	1554.8	7174	2030.8	6357	1843.8	5211.6	1354.6	2670.6	576.8	8862.6	2366.4	Mouse
	Mouse	4985.2	1515.6	6550.4	1849.4	5479.8	1642	4939.2	1280	2886.4	650.2	8805.4	2338.4	Mouse
	Mouse	5045.4	1538.2	6602.6	1916.6	5945.4	1753.4	5199.4	1296.2	2633.8	554.6	7760	2149.2	Mouse
	Rat	6011.8	1837	8354.4	2450.4	6155.8	1799.4	6530.6	1820	3570.4	700	8135.4	2331.6	Rat
	Rat	6200.4	1912.8	8279.6	2396.8	7086.2	2102.4	6436.8	1702	3272	587.2	9739.6	2655.8	Rat
	Rat	5798.2	1800.2	8161.6	2314.2	5883.8	1731.2	6263.6	1683.4	3322.6	696	7691.4	2127.4	Rat
	Rat	6203.4	1928.8	8232.4	2451.4	6876.6	1984.4	6398.2	1784.2	3211.8	700.8	9315.2	2598.8	Rat
	Rat	5425.8	1672	6980	2036.8	5794.4	1759	5531.6	1551.2	2464.8	487.8	8447	2372.4	Rat
	Rat	5271.6	1695.4	7318.8	2190.6	6287	1940.8	5738.6	1600	3166.2	615.2	8311.8	2272.6	Rat
	Sheep	4056.4	1293.4	6065.2	1867.2	5195.2	1587.2	6550.4	1928	2763.2	863.8	8072.6	2476.2	Goat
	Sheep	4286.2	1320.6	6512.4	1861.4	4735.2	1451.6	6023.4	1767.8	2346.4	598.6	8383.6	2555.4	Sheep
	Sheep	3814	1225.8	6269.2	1787	4711.6	1424.4	6199.8	1782	2611.4	742	7680	2305.6	Sheep
	Sheep	4155.2	1295.6	6269	1839.8	4822.6	1420.4	5893.6	1709.2	2358.6	715.4	8377.2	2534.2	Sheep
	Sheep	3549.8	1081.2	5585	1658.2	4350	1297	5759.8	1678.6	2157.4	620.4	8229	2451.6	Sheep
	Sheep	3956.2	1261.4	5692.4	1680.8	4865.8	1434.4	5548.2	1553.4	2455.6	763.8	8156.6	2481	Sheep

## Sheet: Dataset S4
Dataset S4. Data set matrix of the differences in fluorescence intensity before and after the addition of different quantities of FBS (0.10 vol%) to the AIE-polymer. The rightmost column indicates whether the data in the corresponding row was used as training data (denoted by “–”) or test data (results of the verification are shown) in the holdout test.
Analytes	pH = 7.0												pH = 5.0												Verification by Holdout test
	P-None		P-Phe		P-Nle		P-Suc		P-Pht		P-Pyr		P-None		P-Phe		P-Nle		P-Suc		P-Pht		P-Pyr
	Ch1	Ch2	Ch1	Ch2	Ch1	Ch2	Ch1	Ch2	Ch1	Ch2	Ch1	Ch2	Ch1	Ch2	Ch1	Ch2	Ch1	Ch2	Ch1	Ch2	Ch1	Ch2	Ch1	Ch2
Australia_#1	16835.4	5410.2	-118.8	-214.8	9583.8	2900.8	12622.8	4618.6	23456.8	8468	14091.4	5366.2	10442.6	3442.6	16227.4	5216.6	15129.2	4933.4	21732	8735.2	566.6	346.4	21382.6	8205.2	-
Australia_#1	16726.6	5330	535.6	-67.6	9640.8	2898.8	12446.8	4587.4	23484.4	8415.6	13941	5270	10571	3502.2	16101.2	5119.4	14839.6	4849.6	21185.4	8542.8	1411	680.2	20255.4	7788	-
Australia_#1	16276.2	5184.4	460.6	-99.8	9285	2836	12245.2	4508.6	22435	8121.6	13357.2	5083.8	10133.6	3379.2	15488.6	5045.6	14573.8	4803.6	20737.2	8320.6	1310	597.6	20005	7721.4	-
Australia_#1	15737.2	5029.8	430	-98.6	8804.6	2685.2	11943.6	4433.6	22390.6	8070.8	13527.6	5165	10413.4	3424	15519.4	4968.4	14440.2	4733.2	20400.2	8249.4	1663.2	720.4	19902.4	7679	-
Australia_#1	16440.4	5221	948.4	6.2	9059.8	2727.4	11570	4256	21293.2	7498.6	13076.4	4917.4	10267.2	3375.4	15532	4983.2	14769	4812.8	20590	8203.4	1574.6	567.6	19705.4	7431.2	-
Australia_#1	16288.2	5330.2	843.8	138.2	9004.6	2717.6	11653	4312.8	21288.6	7578	13449	5101.2	10322.4	3419.2	15687.4	5025	14696.6	4742.6	20563.6	8171.4	1782.6	700.8	19804.8	7528.4	-
Australia_#1	16725.8	5418.8	-102.6	-228	9054.4	2736.8	12119.8	4467.8	22289.6	8014	13854.4	5328.2	10496.6	3520.2	16035.6	5130.6	15332.8	4978	21644.6	8780.2	1204.4	538	21268	8264.4	Australia_#1
Australia_#1	16462.2	5272.2	397	-14.8	8558.4	2653.4	11626	4332.6	21372.8	7627.2	13250.2	5082.2	10419.4	3453.2	15602.8	5022	14377.2	4683.6	20084.6	8149.4	1541.8	641	20332.8	7873.2	Australia_#1
Australia_#1	16375	5234.6	316.4	-62.4	9032.2	2949.8	11372.2	4165.2	20990.8	7515.2	13264.4	5138	10189	3424	15590.6	5035.8	14483.6	4725.8	20085.2	8107.6	2128	865.8	20108.8	7750.8	Australia_#1
Australia_#1	14610.8	4867	1266	207	9115.2	2806	11140.4	4169.2	20666.4	7544.4	12875.8	4966	9988.6	3353.6	14987	4930	14098.6	4647.2	20017.8	8179.4	1952.2	911	19169.6	7390.2	Australia_#1
Australia_#2	18079	5631.6	791.4	-2.8	9380.4	2804.6	14000.4	5077	25840	9127.8	16209	6064.8	12258	3994	17507.6	5496.6	16412.2	5253.8	21278.8	8401.8	1281	540.8	20611.4	7706.8	-
Australia_#2	17504.4	5508	606	-13.8	9786.4	2894	13835.2	5042	25439.4	8980.6	15929.8	5979	11938.2	3909.8	17615.4	5556	15990.8	5164.6	20911.8	8174.2	1257.6	377	19986	7518.4	-
Australia_#2	17277	5451.2	1017.4	133.4	9196	2732.2	13766.4	4984.6	24733.8	8670.4	15452.4	5771.2	11782.2	3857.2	17010.6	5409.2	15768.2	5046.6	20127	7850.2	1247	366.2	19508.8	7389.4	-
Australia_#2	16601.8	5288.2	1412	207.2	8966	2672.6	14061.4	5028	25065	8799	15890.8	5953.8	11694.6	3822.4	16633.2	5267.2	15786.4	5093	20508.6	8000.8	1513	603.8	19400.4	7305	-
Australia_#2	16772.2	5204.2	1352.4	156.4	9616.2	2869.2	13073.6	4712.6	24257	8371	14231.4	5306.4	12686.6	4305.6	17018.6	5370	15837.6	5079.4	19689.6	7686.6	1403	429.2	18893.4	7008	-
Australia_#2	16475.2	5190	1102.2	134	9776.6	2923.8	13279.6	4809	24509.4	8568.4	15024.4	5598.4	12154.6	3991.6	17017.8	5334.6	15855	5120.2	19248.6	7615.2	1188.8	340.6	19075	7165.6	-
Australia_#2	17019.4	5462.4	724	-4.8	10121.4	2959.2	14139.4	5144.6	25417.2	9015.4	15441.4	5811.6	12409	4033.2	17613.4	5558.6	16751.6	5447.2	20505.8	8126.8	918.4	464	20484.2	7766.4	Australia_#2
Australia_#2	16728.6	5307	981.4	47.2	9265.6	2757.6	13087.4	4789	24234.2	8521.6	14492	5495.4	12555.8	4157.6	17058.4	5401.4	16184.8	5280.4	19647.2	7737	1132.6	374.8	19393	7373.2	Australia_#2
Australia_#2	16424	5189.4	1499.4	287.4	9441.6	2844	13176.2	4817.6	24197.8	8486.8	14521	5521.6	10548.6	3766	17032.4	5397	15896.6	5182.4	19289.2	7632.8	1173.4	333.4	19054.8	7275.8	Australia_#2
Australia_#2	15939.6	5135.4	1864	454.8	9943.4	3018.4	11870.4	4369.2	21195.2	7536.6	13384.8	5103.4	11343.2	3756.4	16135.4	5183.6	14860.6	4865	19532.4	7790.6	1436.8	517.4	18834.8	7124.4	Australia_#1
Chile_#1	16610.8	5191.4	-402	-255.6	8514	2504	12997	4746.2	23658.6	8513.4	15813	5982.2	11240.6	3644.6	16680.4	5311.8	15753.4	5060.2	22838.8	9190.6	1056.2	459.4	21824.6	8405.6	-
Chile_#1	16885.4	5219	145	-114	8608.8	2593.4	13484.2	4989.4	23840	8665.6	15783.6	6083.8	11132.4	3648.4	16888.6	5423.8	14921.2	4838.4	21673.4	8777.4	1318	607.4	21029	8039	-
Chile_#1	16723.4	5233.6	163.6	-93.4	8232	2440.6	12882.2	4770	22639.8	8194.6	15169.2	5889.8	11121.6	3675.8	16413.6	5192	15386.4	4995.2	22101.8	8945.8	1501.4	559.4	20545.8	7888.8	-
Chile_#1	15869.2	4980.2	328.6	-82	7830.6	2343.6	13380.8	4936.6	22682.4	8225.2	15186	5864.6	10942.4	3561	16296.4	5137	15325.4	5010.8	21567.6	8692.4	1665.6	658.6	20468.8	7870	-
Chile_#1	16003.6	5030.4	676.6	58	8640.4	2519	12049.4	4436.8	23627.6	8522	15529.2	5938	10966.2	3625.2	16202.6	5109.8	15376.4	4977.8	22100.2	8919.8	1313.8	550.2	20425.2	7819.8	-
Chile_#1	15286	4861	244.4	44.4	8628.8	2500.4	12060	4455.6	23515	8528	15117.8	5814.6	10914.8	3563.2	16176.2	5113.6	15240.8	4902	21819	8762.6	1414	635	20331.8	7839.6	-
Chile_#1	16953.2	5323	-805	-445.2	8569.4	2519.4	12929.6	4775.6	24148.4	8816.4	15774.4	6064.4	11356.2	3759.2	16853.4	5443.6	15719.2	5117.8	22738.2	9322	1142.6	593.4	21580.8	8304.4	Chile_#1
Chile_#1	16336	5121.8	-339.4	-281	8238.6	2479.6	11929.2	4365	23576	8627.4	15496.4	5958.6	11030.2	3656	16243.2	5163.2	15233.8	4977	21006.4	8505.6	1297	564	20382.2	7922.2	Chile_#1
Chile_#1	16561	5159.6	16.8	-206.2	8348.4	2445.6	12264.4	4545.6	23170.6	8421.8	15083.8	5903.8	11040.4	3663	16152	5164	15226.6	4955	22154.6	8988.2	954.8	517.4	20150.4	7810.4	Chile_#1
Chile_#1	14672.6	4744.4	967.6	174	8790.2	2715.6	11166	4192.6	21366.2	7789.4	13292	5163.8	10048.8	3337.2	15580	5031.4	14161.8	4663.6	21190.6	8571.6	1250.4	648.2	19958	7708.6	USA_#2
Chile_#2	15145	4799.4	-1123.2	-415.6	7742.6	2256.4	12615.4	4657.6	23846.6	8745.4	14962.2	5707.6	10710.8	3488.8	16485.6	5244	15269.8	4972.4	23045.6	9389.4	1212.2	554.2	22164.2	8574.4	-
Chile_#2	15028.2	4754	-1379.8	-571.8	7409.6	2146	12482	4641.6	23670.4	8692.8	14636.2	5656.8	10949.2	3550.2	16024.8	5141.8	14971.6	4912.4	22734.4	9256.6	1125.8	561.6	21115	8183.6	-
Chile_#2	14901.2	4702.2	-1450	-641.2	7452.2	2178.4	12126	4532.4	23005.2	8448.2	14247.8	5478.2	10898.8	3578.4	16124.2	5156.6	14798.8	4787.6	22172.8	9002.2	1086.6	664	20548.8	8048.6	-
Chile_#2	14706	4624.6	-354.6	-272.6	7054.2	2081.2	12053	4494.8	22423.2	8194.6	14331.6	5500	10705	3531.6	15362.8	4864.6	14747.8	4787.8	22188.6	9041.2	1110.4	470	20668.4	8024.6	-
Chile_#2	14408.4	4597	56.8	-202.6	7308.8	2132.2	12389.6	4585.8	23236.2	8496.2	16364.8	6260.6	10850.6	3585	16023	5110	15019.6	4921.2	22094.2	9017.4	1058.6	549.2	20614.4	8067.4	-
Chile_#2	14354.4	4520	83.6	-176.6	7537.6	2244	12566.6	4637.4	24205.4	8851	16122	6123.6	11021.8	3616	16715	5229.2	14888.6	4853.8	22760.4	9126.2	1333.6	527.4	20691.8	7980	-
Chile_#2	14811.4	4741.4	-754.4	-418.2	7521.6	2213.6	13085.4	4787.8	25010.2	9208.2	16858	6465.2	11157.8	3662.4	16872.6	5376.6	15389.4	5042.8	22891.4	9411.4	918.6	423.4	22003	8567.2	Chile_#2
Chile_#2	14790.4	4644.2	-261.6	-339	7044.2	2094	12167.8	4533.6	24001.4	8747	15636.2	5977.2	11144.2	3696	15975.8	5139.6	14841	4877.4	21514.4	8835.2	1147.4	544.8	20703.6	8057.6	Chile_#2
Chile_#2	14221.2	4558	-321.8	-319.2	6873.4	1986	12260	4583	23979.8	8796.2	16386.4	6242.6	11032.4	3642.8	16053	5131.6	15002.6	4917.4	22061	9123.6	1379.2	672	20674.2	8031.8	Chile_#2
Chile_#2	13717.4	4450	257	-27.8	7986.4	2489.4	11222.2	4171.6	21143.6	7810.8	13685.2	5323.4	10044.2	3307.4	15279.4	4895	14512	4736.8	21172	8723.4	1348.8	694	20027.6	7860.4	USA_#2
Ireland_#1	16835.4	5236.4	-429.2	-352	9141.8	2643.8	12074	4433.2	22557.8	7868.6	13809.6	5238	10431.4	3407.8	16337	5168.8	15032.2	4841.4	21488.2	8720.4	571.8	123.6	20715.4	7686.8	-
Ireland_#1	16542.6	5122.4	-235.4	-271.8	8489.4	2498	12182.8	4465.4	23580.4	8421.2	13843.2	5370.2	10183.4	3325.4	16271.2	5191.4	15483.4	5020.8	21522.8	8734.4	580.2	264	20166	7539.6	-
Ireland_#1	16114	4978.8	221.4	-99.8	8421.8	2457.2	11853.8	4350.4	22609	7978.8	13827.6	5330	10223.2	3352.8	16015.8	5017.8	14942.4	4923.2	20507	8300.4	540.4	217	19775.4	7460.2	-
Ireland_#1	15978.2	4969.8	162.8	-175.8	8259.6	2444.6	11436.6	4224.6	22070	7805.6	13554.4	5194.8	10167.6	3359.2	15343	4903.8	14234.6	4663.4	20864	8423.6	629.6	146.2	19642.6	7390.6	-
Ireland_#1	15410.6	4814.8	647.8	-48	8489.4	2546.4	11194.6	4132.2	20935.2	7404	14083.8	5460.6	11047.2	3594.2	16052.2	5069.8	14458.6	4674.4	20567.4	8288.6	951.6	289.2	19173.2	7273	-
Ireland_#1	15226	4825.8	560.6	-46	8238.8	2462	10981.8	4004.6	20811.8	7355.8	13834.4	5298.6	10740.2	3533.6	16062.2	5039.2	14487.6	4811.2	21257.4	8543.4	827	211.6	19238.8	7247.8	-
Ireland_#1	15985.6	5058.8	-175	-236.4	8759.6	2554	11567.6	4278	21847.4	7866.2	14662.8	5635.4	11401.6	3774.2	16190	5131.2	14934.2	4850.8	21367.4	8684.8	613.8	237.6	20383.4	7756.6	Ireland_#1
Ireland_#1	15345.4	4796.2	23.2	-162.2	8222.2	2430.8	10846.6	4003	21139.6	7510	13830.2	5322.2	10897.6	3585.2	15842	5086	14225.4	4666.2	19997	8217.2	621.8	192.2	19609.4	7515.8	Ireland_#1
Ireland_#1	14829.2	4673.8	229.8	-85	8132.8	2410	10666.6	3946.4	20908.2	7462.4	14047.4	5407.2	10615.4	3567.4	16062.4	5096.6	14332.8	4650.6	20604.2	8451.4	657.8	222	19279.4	7380.6	Ireland_#1
Ireland_#1	14785	4702.6	913.6	24.6	8722.8	2671	10451	3908.4	20126.2	7281.8	12816.8	4990.8	10002.8	3293.6	15349.4	4942.8	14135	4625.8	20108.8	8303.6	750	433	19165.4	7204.8	Ireland_#2
Ireland_#2	15516.4	4969.8	-98.4	-221	8988.6	2659.6	11980	4347.2	22589.4	8153.4	14559.6	5548.2	10458.6	3432.4	15815.8	5069.6	14863.6	4857.6	22959.4	9169	809	380.2	21950	8356.2	-
Ireland_#2	15717	4995.2	1.6	-185.8	9340.2	2818.2	12016	4399.6	22015	7964.8	13920.6	5331.2	10234.8	3386	15769.2	5030.6	14666	4794.2	22801.8	9478.8	878.6	552.8	21100.8	8050.4	-
Ireland_#2	15629.6	4909.2	-139	-212	8949.4	2647.8	11477.2	4220.8	21507.6	7700.2	13700.4	5224	10311.4	3360.8	15530.6	4944.8	14470.2	4698.4	21898.4	8830.2	1057.4	524.6	20556.2	7872.4	-
Ireland_#2	14855.4	4725.2	573.6	24.6	8670	2584.6	11402.2	4217.2	21270.6	7616.4	13736.6	5260.8	9786	3231	14856.8	4756.6	14122.2	4621	21499.6	8694.4	1063.8	528	20586.4	7805.4	-
Ireland_#2	15014.8	4774.4	540.8	-30.4	8227.2	2432	11772	4269.8	21227.2	7655.8	13441	5153	10198.8	3332	15490.8	4885.8	14210.2	4589.8	22037.4	8808.2	947.6	403.8	19867.8	7625.8	-
Ireland_#2	14748.6	4702.8	409.8	-135.8	8047.8	2431.6	11799.2	4295.4	21154	7541.8	13346.4	5083.8	10005.8	3247.8	15098.8	4796.2	14270	4656.2	21965.2	8816.2	1115.8	432.4	19778.6	7509.8	-
Ireland_#2	15413.4	4892.4	-230	-248.2	8106	2345	12053.8	4390.4	22865.6	8228.4	14151.2	5431.2	10359.4	3378.8	15690.4	4964.4	14632.2	4834.6	23012.4	9220.8	1213.2	422.4	20992.6	8054.4	Ireland_#2
Ireland_#2	14911.4	4722.2	-290.8	-235.8	7853.6	2330.2	11409.4	4196.6	21307	7736.4	13256.8	5106.2	10298.4	3505.2	15079	4849.2	14053.6	4660.6	21826.8	8785	1124.8	421.4	19994.2	7772	Ireland_#2
Ireland_#2	15004.8	4749.6	133.6	-193	7984.8	2417.8	11306.2	4167.6	21770	7927.8	13278.6	5131.4	10253.2	3352.4	15084.4	4924.8	13960	4565.6	21600.4	8633.8	902.6	405.4	19577	7566.2	Ireland_#2
Ireland_#2	14587.8	4746.2	693.4	1.2	8553.8	2598	10832.6	4019.6	20840.4	7689.6	13270.6	5111.2	10046.6	3324.2	15303.8	4954.4	14104.6	4661.2	20857.4	8547.2	935.2	491.8	19940.4	7639.8	Ireland_#2
USA_#1	14524.2	4736.2	-806.8	-379.4	8573.4	2613	12074.4	4436.4	22402.2	8120.4	14320.4	5438.4	10076.2	3319	15077.2	4880.6	14675.8	4797	23019	9278.8	-637.4	104.4	21680.8	8425.8	-
USA_#1	14215.2	4579	-659.2	-394	8779.8	2681.6	11723.4	4319.4	22104	7939.4	13796.2	5250.4	9879.6	3325.2	15178.4	4876	14250.2	4677.4	22255.2	8998	-1.6	270.4	21110.6	8269.2	-
USA_#1	13968.4	4482	-784.4	-359	8445	2568.4	11251.2	4133.6	21702.6	7845.4	13589.4	5145.6	9808.4	3262	14870.6	4780.6	13815.6	4571.6	21463.4	8726.2	-131.4	267.2	20387.8	7941.8	-
USA_#1	13509.6	4382.4	-604.6	-396.8	7803.2	2358.2	11365	4157.2	21168.8	7689.6	13426.8	5130.8	9896	3270	14393.6	4640	13904.6	4542	21798.4	8819	414.6	368.6	20372.2	7893	-
USA_#1	12683.8	4102.6	-602.8	-309	8244.6	2544.2	11253.2	4110.2	21067.4	7575	13253	5041.4	9476	3132.4	14638.8	4690	13871.6	4531.8	21349.4	8596.6	114.4	308.4	19683.6	7623.2	-
USA_#1	13554.4	4401	-557.2	-305.8	8200.4	2577.6	11152.6	4103.8	21277.6	7619.8	13003	4993.4	9519.4	3115.6	14690	4739.2	13722.4	4485	21121.4	8539.6	314.4	284.4	19891.8	7692.8	-
USA_#1	14311.8	4675.2	-1525.2	-599.4	8273.6	2512.8	11755.4	4349.2	22082.8	8038.2	13475.6	5196.2	9917	3278.8	14889.6	4744.2	14387	4690.6	22280	9076.4	-258.2	288.2	20758.4	8117.4	USA_#1
USA_#1	13676.2	4440.8	-1191	-498.8	7706.4	2410	10954.6	4068.2	21209.8	7677.4	12966.6	4930	9661.4	3236.6	14433.8	4649.4	13824.2	4565	20995.2	8505.4	19.8	361.6	19766.2	7802.4	USA_#1
USA_#1	13577.2	4382.4	-1084	-522	7829	2375.2	10885.2	4025	20796.8	7609.2	12943.4	4983.6	9459.2	3154.8	14520.8	4654.8	13648.6	4534.8	20983.6	8531.6	-25.2	281.2	19734.4	7707.8	USA_#1
USA_#1	13693.6	4456.6	-849.6	-499.8	7853.6	2392.2	10791.4	4029	20548.2	7473	12913.8	5010	9990.6	3327.8	14670.4	4758.6	13995.6	4605.4	21159.4	8650.8	50	359.4	20038.4	7733.8	USA_#1
USA_#2	15144.2	4909.8	85.6	-112	9188	2775.2	11960	4393.8	22261.8	7926.4	14063.6	5385.6	10122.2	3366.6	15779.2	5105.8	14878.2	4867.8	22704.8	9225.2	1125.6	620.4	21041.2	8108.8	-
USA_#2	14987	4880.6	562	73.2	9413.2	2913	11583.2	4280.2	21677	7720	13709	5267.2	9934.4	3294.6	15628	5035.6	14574.8	4765.2	21813.4	8914.6	1996.8	845.6	20189	7717	-
USA_#2	14555.6	4714.4	473.8	17.2	9061.6	2823.8	11274	4171.6	21136	7548.4	13166.2	5025.4	9674.4	3250.8	15249.4	4895.6	14248.2	4694.8	21088	8458.6	1674.8	771.6	19507.6	7445.8	-
USA_#2	14200.8	4573.6	399.6	11.8	8566.8	2655.8	11341	4173.2	21054.4	7527.6	13304.6	5089.2	9716.2	3203.4	14554	4749.8	14041	4616.8	21295	8634	2308.8	1016	19862.2	7587	-
USA_#2	14254.4	4602.4	988.6	192.4	8989.4	2725	11130.8	4146	20935.8	7462.2	13112.6	5002.4	9721.2	3214.2	15177.6	4893.2	14223.6	4683.8	20921.6	8457.2	1791.4	837.8	19621	7492	-
USA_#2	14032.6	4571.4	721.6	99.8	8982.2	2816.6	11153.2	4179	20801.2	7412.4	12998.6	4933.8	9472	3184.4	14927	4795.8	13981.2	4607	20917.2	8479.6	1705	721.6	19337.2	7459.8	-
USA_#2	14999.6	4850.6	-43.6	-126.6	8871	2750.8	11548.8	4262.2	21717.6	7806.6	13476.6	5189	9864.6	3300.6	15479.2	5004.6	14615.8	4864.6	21783.4	8878.6	1256.6	622.6	20671.4	8025.4	USA_#2
USA_#2	14526.4	4693.4	320.4	-30.6	8152.8	2525.2	10677.8	3954	20610.8	7426.4	12601.6	4844	9616.4	3188.4	14598.2	4780.6	14074.2	4616.6	20480.2	8335.6	1817.4	740.2	19634	7604.6	USA_#2
USA_#2	14430	4617.2	438.8	2.4	8195	2487	10776.6	4016.6	20473	7374	12589.4	4851.2	9331.4	3159.6	14534.6	4782.6	13742.6	4544.6	20141.4	8246.2	1801.6	773.4	19399.2	7535.2	USA_#2
USA_#2	13862.2	4537.2	481.6	27.4	8376.2	2621.8	10629.4	3972.8	20280	7532.8	12845.8	4962	9763.2	3259.4	14041.8	4952	13800.6	4570.2	20055.4	8340	1860	830.8	19360.2	7490	USA_#2

## Sheet: Dataset S5
Dataset S5. Data set matrix of the differences in fluorescence intensity before and after the addition of FBS (0.10 vol%) stored under eight different conditions to the AIE-polymers. The rightmost column indicates whether the data in the corresponding row was used as training data (denoted by “–”) or test data (results of the verification are shown) in the holdout test.
Analytes	pH = 7.0												pH = 5.0												Verification by Holdout test
	P-None		P-Phe		P-Nle		P-Suc		P-Pht		P-Pyr		P-None		P-Phe		P-Nle		P-Suc		P-Pht		P-Pyr
	Ch1	Ch2	Ch1	Ch2	Ch1	Ch2	Ch1	Ch2	Ch1	Ch2	Ch1	Ch2	Ch1	Ch2	Ch1	Ch2	Ch1	Ch2	Ch1	Ch2	Ch1	Ch2	Ch1	Ch2
No treatment	15490.4	5055	1126.8	169.4	8974	2784.6	11362.8	4241.6	21072	7758.8	13506.4	5237.8	10292.6	3451.2	15907.6	5215.6	14376.8	4727.8	21954.2	8945.6	1692.6	711	20599.6	8049.2	-
No treatment	15260.2	5006.8	865.6	158.6	8981.2	2757	11288.4	4225.6	20749.4	7592.6	13259.2	5149	10361.4	3448.6	16012	5214.6	14531	4758.4	21156.8	8618.2	1303.4	590.6	20073.4	7800.4	-
No treatment	15025.8	4950.8	847.4	147.8	8506	2637.8	10915	4021.8	20492	7507.4	13251.2	5146.6	10313.2	3434	15756	5108.2	14334.2	4727.4	20468.6	8403.8	1154.2	563.2	20233.6	7841.8	-
No treatment	15061.4	4931.6	540.4	59.8	7850.6	2410	11258	4194.6	20627.8	7558.2	13113.6	5100.4	10439.6	3473.8	15431.4	5052.2	14227.8	4674.2	20458.2	8396	1318.6	611.4	20254.6	7750.8	-
No treatment	14742.2	4840.4	860.4	96.2	8490.2	2602.6	11224.6	4196	20270.6	7500.6	13207.6	5107.4	10266.2	3425	15598.4	5058.4	14275.8	4668.8	20276.2	8301.6	1312.6	609	19899.8	7695	-
No treatment	14975.4	4891.8	1005.4	147.6	8322.8	2584.2	10955.2	4094.8	20352.8	7442.4	13066.6	5043.6	10358.8	3449.2	15535	5059.8	14192.8	4641.6	20126.4	8223.4	1195.6	573	20032	7632	-
No treatment	15828	5108	455.8	-64.4	8875.6	2738.6	11411.8	4278.6	21386.4	7735.8	13847.2	5295.2	10568.8	3533.8	16452.8	5319.4	14858	4917.6	21559.4	8850.2	1108	589.4	21624.6	8345.6	No treatment
No treatment	14780.6	4768.4	1168	234.4	8481	2623	11295.4	4246	20839.4	7569.4	13439.2	5170.6	10373.4	3450	16106.6	5219.8	14472.8	4742.2	21542.6	8790.4	1315.8	658	20722.8	8018.8	No treatment
No treatment	15049.4	4966.6	1022.2	170	8741.6	2720.4	11256.4	4209.2	20797.4	7607.6	13344.6	5138	10240	3403.6	15781	5060	14404.6	4770.8	21031.6	8529.8	1371.8	586.8	20257.4	7732.8	No treatment
No treatment	14850.8	4887.4	899.2	53.4	7882.6	2469	11174.2	4186.6	20957	7637.6	13180.6	5110.2	10343	3443.2	15326.8	4945.8	14405.8	4733.8	20874.4	8502.8	1625.6	680.8	20606.8	7994.4	4-2w
37-1w	14482.4	4659	645.2	24	7801.6	2364.6	10476.8	3896	21088.8	7694.8	12056.8	4651.2	10842.2	3661.6	16127.4	5254.6	14298.8	4725.4	22227.8	8963.4	2975	1037	21158.4	8355.2	-
37-1w	13824.2	4423.2	537.4	31.8	7791.6	2461	10147.4	3759	20658.2	7474.2	12174.8	4670.8	10443.4	3547.8	16449.4	5327.4	14087.6	4687.6	20546.4	8379.6	1483	641.4	20165.8	7908.6	-
37-1w	14089	4523	346.2	-105.2	7477.4	2332	10125.2	3779.2	20137.4	7271.6	12199.2	4699.8	10449.6	3504.4	16023	5179.4	13750.6	4619	20388.8	8243.8	1491.8	583	19994	7833	-
37-1w	13954.2	4443.2	196.6	-36.4	6796	2120.2	10376.8	3848.6	20239.8	7257.2	12104.2	4691.4	10426.4	3505.8	15863.4	5177.8	13735.8	4603.6	20274.2	8233	1613.6	609.6	20090.4	7902	-
37-1w	13943	4466.4	367.6	-58.8	7196.4	2263.8	10155.2	3796.6	20028.8	7234.2	11964	4598.4	10433.6	3543.8	16011	5215	13593	4517.6	19965.8	8182.6	1421.4	592.6	19734.2	7743	-
37-1w	14234.2	4540	345.8	-42.4	7238.8	2236.2	9953.4	3727.6	20032	7235	12064.2	4645.6	10450.6	3499.8	15964.4	5191.8	13655.8	4506.4	20072.4	8093.4	1937.8	541.6	19853	7892.6	-
37-1w	14919.4	4754.8	61.6	-102.2	7657	2437	10362.6	3845	21133.2	7632.6	12715	4873	10921.2	3690.8	17056.8	5503.2	14372.8	4771.6	21435.8	8791.6	1461	655.2	21361.6	8378.8	37-1w
37-1w	13755	4394.8	553	129.4	7441.4	2351.4	10325	3867	21031	7556.8	12536.4	4839.2	10497.2	3532.4	16145.4	5279.6	13966.6	4684.8	21168	8761.2	1644.2	627.2	20689.6	8164.6	37-1w
37-1w	14004.8	4492	691.8	19.4	7569.4	2401.4	10205.2	3795.2	20760	7509.8	12265.6	4750	10506.2	3501.2	16131.4	5249.6	13837.4	4615.8	20739.6	8521.6	1811.6	576.2	20100.6	7915.4	37-1w
37-1w	13944.6	4486.8	353.2	123.2	6707.6	2111	10047.6	3753.2	20294.4	7439.8	12203.4	4728.6	10439.2	3523	15484.4	5070.8	13839.8	4623.2	20750	8381.4	2145	763.8	20313.2	8070.4	37-1w
37-2w	14737.2	4659.2	823.2	132.6	7864.4	2481.2	8949.2	3300.8	20409.8	7451.2	11190.8	4256.2	11230.8	4162	16239	5322	14620.6	4829.6	20930.4	8376.4	3337	1083.8	20758.2	8129	-
37-2w	14503.8	4560.4	579.8	2.6	7460.2	2313	9015.2	3421.8	19870.4	7199.8	10644	4108.8	10854.6	3664.8	15995.8	5235.6	14104.2	4684.2	19951.8	8058.4	2407.4	844.8	19959	7747.6	-
37-2w	14473.6	4558.8	391.2	3.8	7147.6	2265.6	8681	3253.2	19385.2	7040	10750.4	4075.6	10774	3599.2	16134.2	5235	13983	4670.2	19762.2	7833.8	2425.4	867.8	19813.6	7705.4	-
37-2w	14696.4	4643.6	110.2	-91.6	6924.6	2154.2	8697.6	3214	19496.2	6968.2	10379.4	3992.4	10714.6	3610.8	15436	5048.4	13979.8	4665.8	19448.4	7805.6	2589.6	925	19680.4	7586.4	-
37-2w	14371.6	4554.2	194.4	-4.2	7397.2	2291.2	8800.2	3249.6	19513.4	7098.2	10660.8	4100	10632.2	3601.8	15963.8	5175.2	13918	4629.6	19362.8	7884.4	2337.4	880.6	19501.2	7567	-
37-2w	14499.4	4589.2	494.4	-11.4	7353	2316.4	8513.6	3173.4	19434.2	6947.6	10604	4091	10795.4	3612.4	15397.8	5047.6	13921.8	4585.6	19370	7743	2257.4	851.8	19571.2	7686.8	-
37-2w	15482.2	4824.4	-237.8	-181.2	7704.2	2419.4	9039.2	3290.2	20151	7301.4	11141.4	4282.8	11133.2	3764.2	16663.2	5418.2	14569	4819	21329	8639.8	2388.6	918.6	21088.8	8230.8	37-2w
37-2w	14283.4	4540.8	825.6	150.4	7493	2373.6	8846.6	3316.6	20030.8	7221	11003.2	4172.2	10810	3621	16264.8	5349.8	14273.2	4772	20477.6	8332.8	2504.6	993.8	20202.6	7956	37-2w
37-2w	14453.4	4566.8	576.6	102.4	7727.8	2427.6	8860	3305.4	19763	7146.4	10908.8	4201	10744.8	3600.2	15975	5196.8	14133.8	4713.4	20100	8232	2651.4	868.8	20077	7794.4	37-2w
37-2w	14676.2	4641.8	430.8	107.6	6714	2054	8673.6	3252.4	19606.6	7139.6	10681	4111	10851	3646.6	15440.4	5067.8	14056.6	4663.4	20069.4	8101.4	2316.6	865.2	20090.8	7846.4	37-2w
37-4w	15166.4	4730	1427.8	308.8	8468.6	2662.2	7075	2609.8	18757.6	6694.8	9277.2	3510.6	11691	3936.4	16689.8	5482.6	15189.8	5125.4	20406	8074.6	3534.2	1120.8	20546	7978.4	-
37-4w	15040	4766.2	727	144	8167.4	2584.4	6885.2	2596.4	18262.8	6559.6	9031.6	3430.8	11515	3915.4	16767.2	5503.8	15636.4	5226.6	19243	7688.6	2827.8	898.2	20184.8	7816	-
37-4w	14814	4673.4	611.6	70.2	7824.4	2522.6	6816	2557.4	18265.6	6469.2	9005.2	3476.8	11593.8	3915.6	16489.6	5392.6	14475	4810.6	19328	7623.4	2476.8	801.4	19924.2	7729.6	-
37-4w	14919.2	4724.6	611.8	140	7179.8	2289.8	6848.6	2561.8	18153.8	6460.2	9017.6	3431.8	11524.8	3866.8	16020	5196	14363.8	4775	18932.8	7470.6	2168	713.8	19848.6	7668.2	-
37-4w	14618.2	4663.8	761.2	80.2	7702.2	2488.6	6877.6	2600.4	17976.4	6358.4	8898.6	3361.8	11433.2	3836.2	16390.4	5324.2	14246.4	4718.4	18627.2	7384.8	2291.8	784.2	19853	7603.6	-
37-4w	14789.8	4683.8	885.8	141.8	7963.6	2577.6	6735.4	2541.8	17220.2	6019.4	8928.2	3397.2	11398	3847.4	16198	5212.8	14411.4	4781	18838.4	7429.4	2524.2	804.2	19951	7651.2	-
37-4w	15929.8	4983.6	428.6	58.4	8224.4	2551.8	6766.4	2526.2	18522.2	6581	9127.8	3420.2	11763.6	3975	17210.8	5595	15157.2	5068.4	20312.4	8094.6	2263.6	802	21017.6	8165.4	37-4w
37-4w	14517	4643.8	1085.4	249.8	8026.2	2513.8	6909.8	2560.8	18292.4	6523	9044.2	3495.8	11512.4	3880	16860.4	5516.4	14771.6	4958.2	20028.8	7968.2	2514.2	881.4	20466.4	7857.4	37-4w
37-4w	14776	4659.4	1133.8	330.6	7988.4	2610.2	6767.4	2535	18248.2	6527.6	8984	3416.8	11389	3890.4	16540	5368.2	14561	4901.8	19538.2	7810.2	2598	947.2	19998	7745.8	37-4w
37-4w	14999.8	4633.6	645.4	98.8	7066.8	2235.6	6664.2	2450.2	17853.2	6334.8	8602.8	3300.6	11459.6	3873.4	15823.4	5113.4	14306.8	4781.6	19097.4	7554.8	2839.6	932.6	20058	7732	37-4w
4-2w	15467.8	5009	640.8	25	8365.2	2569.4	11353.4	4258	21601	8022.8	13555.6	5251.6	10540.4	3538.4	15999.8	5181.8	14543.2	4765.4	21848	8844	2236	858.8	21104.6	8178.4	-
4-2w	15413.8	4971.4	181.8	-159	8367	2510.8	11466.4	4252.8	21583.2	7934	13343.6	5145.2	10637	3540	15929.6	5089.2	14168.8	4716.4	21368.2	8652.4	1027.4	495.4	20418.8	7819.6	-
4-2w	15312.8	4978.4	-113.6	-145	8052.2	2476.4	11248.6	4183.8	21483.6	7950.6	13163.8	5087.2	10674.2	3524.8	16513.4	5332	14108.8	4624.4	21125.2	8609.2	1867.2	813.4	20154.6	7770.6	-
4-2w	15252.8	4882	-39.4	-294.8	7219.2	2205.4	11301.6	4179	21113.6	7888.8	13316.6	5104.6	10642.2	3511.2	16007.2	5096	13947.8	4597.6	20843.4	8512.2	1662.4	777	20145.8	7714.4	-
4-2w	14999.8	4829.6	-40.4	-248.8	7770	2382.4	11301.8	4228.8	21496.4	8030	13146.2	5028.8	10435.2	3482	16478.6	5247.6	13974.4	4601.8	20339.2	8185	1291	623.8	19891.2	7660.2	-
4-2w	15156.2	4892.6	-181.4	-172.8	8114.2	2425	11148.4	4087.2	21250.2	7853.6	13089.6	5068.8	10537.2	3476.2	16104.4	5158.4	14048.8	4631.4	20621.2	8368.8	1149.8	512.6	20000.4	7790.2	-
4-2w	16019.4	5145.8	-193	-258.6	8589.4	2586.8	11767.4	4315.8	22109	8088.8	13639.2	5237.4	10924.4	3659.4	17067.6	5535.4	14529	4805.4	22073.6	9032.2	1488.6	696.8	21128.8	8217	4-2w
4-2w	15140.6	4839.2	352	-71.8	7754.8	2364.8	11257.6	4195.2	21626.8	7967.8	13410.6	5143	10553.8	3524.4	16801.4	5311	14319.2	4799.6	21459.2	8750	1579.2	741.2	20606.8	7955.6	4-2w
4-2w	15244.6	4881.6	170.4	-44.6	8219.6	2544.6	11266.4	4184.2	21255.6	7914.8	13247.8	5093.4	10459.2	3462	16542.6	5283.6	14148.2	4642	21263.8	8700.4	1513.2	694.6	20289.6	7839.6	4-2w
4-2w	15215.4	4854.4	-14.2	-165.6	7127.8	2118.4	11256.2	4203	21428	7932.8	13220.2	5061	10640.2	3503.8	15936.8	5095.8	14108.6	4661.6	21401	8711.2	1459	668.6	20310	7865.2	4-2w
4-4w	15613.6	5117.6	326.4	-48.8	8363.8	2509	11348.4	4211	21246.8	7915.8	13775.8	5277.6	10594.2	3613.8	16296	5251.4	14378.4	4751.8	22173.2	9056.6	2408.2	865.8	21479	8274.4	-
4-4w	15704.4	5070.6	154.4	-208.6	8008.6	2464.6	11569.4	4362.6	20843.2	7754.2	13146.8	5100.8	10551.4	3509.6	16066.8	5220	14101.8	4664.4	22073.8	8991.6	1608.4	739.8	20236.2	7852	-
4-4w	15269.4	4929.2	-125.6	-213.2	7789	2368.4	11345.2	4152.6	20514.2	7551	13048.4	5073.6	10503.2	3521.6	16050.4	5155	14022.6	4637.2	21699.8	8791	1903.4	738.6	20061.4	7742	-
4-4w	15201	4921.8	-214	-234.6	7041	2131.6	11344.6	4187.4	20495.4	7558.4	13117.4	5077.6	10593	3522.2	15321.2	4980.8	14019.4	4640.8	21283.6	8645.8	1383.6	704.4	20084.8	7781.8	-
4-4w	15199.2	4870.8	274.2	-101.6	7860.8	2424.2	11264.6	4212.2	20478	7543	12904	4965.4	10371.2	3426.8	15744.2	5117.4	13870.8	4601.4	21260.8	8578.6	1604.4	696.8	19918.2	7680.4	-
4-4w	15251.4	4894.6	72.6	-156.2	7972.6	2462	11299.6	4159.2	20684	7631.8	13078.2	5049.8	10449	3470.2	15695.4	5090	14082.4	4637.8	21403.6	8733	1133	580.8	19915.6	7627.2	-
4-4w	16086	5157	-34	-201.6	8409.4	2610.2	11864.4	4336.6	21621.4	8013.8	13655.6	5232.4	10758.6	3565.8	16610	5401.2	14678.6	4878.8	22785.8	9266.2	1613.2	680.4	21293.4	8327.2	4-4w
4-4w	15060.8	4844.8	342.6	23.6	7908.8	2473	11410.4	4190.8	20902.2	7660	13140.8	5082.2	10506.2	3485	16152.6	5233.8	14345	4765.6	22145.2	9057.6	1717.8	818	20392.8	7871.2	4-4w
4-4w	15265.2	4897.8	534.8	-50.8	8058.2	2484	11279.6	4176.8	20654	7644.8	13027.2	5024.8	10384.6	3498	15925.6	5119.2	14075.4	4641.6	21953.4	8931	1889.4	785.2	20121.8	7773.4	4-4w
4-4w	15146.4	4886.4	-210	-198.4	6769.2	2058	11313.4	4186	20644	7602	12931.4	5034.2	10394.2	3445.8	15239	4942.6	14094.6	4608.6	21953.8	8906.6	1899	749.8	20347.4	7871.8	4-4w
56-0.5h	17635.4	5657.4	1820.2	325.2	9923	3043.8	12218.6	4382	21735.2	7723.6	14093.8	5298.2	12481.6	4153	17148.2	5439.2	15058.4	4920.2	20605.4	7976	2759.6	1051.2	20827.8	7962	-
56-0.5h	17512	5649.8	1712.6	209.8	9494.2	2886	11930.8	4278	21605.6	7644.4	13763.6	5151.4	12309.6	4081.4	16784.8	5388.2	14744.8	4723.6	20135.8	7789	2158	809.8	19709.8	7510.4	-
56-0.5h	17198.6	5470.4	1385	141.8	9522.8	2876.4	11891	4254	21206.8	7427.4	13607	5125	12170.2	4063.8	16554.8	5327	14598.4	4824	19876.8	7744.2	2273.8	910	19873.4	7524.2	-
56-0.5h	17054.4	5494.6	1022.8	11.6	8402.4	2486.6	11880.2	4304.4	21195.8	7451.2	13667.8	5127.4	12355.8	4095.6	16079.8	5150.8	14661.8	4787.4	19566.2	7595.6	2018.4	779.2	19559	7524.8	-
56-0.5h	17033.4	5517	1676.6	162.4	9473	2854	11854.2	4191.8	21129	7433	13413.4	4984.2	12051.4	4027.4	16476.2	5283.2	14447.8	4692	19658.4	7586.8	1725.8	732.8	19404	7347.4	-
56-0.5h	16962.6	5378.8	1668.6	218.2	9482.2	2866	11568.2	4180.8	21410.2	7436	13479.4	5025.8	12080.4	3989	16440.4	5217.8	14622.2	4786.4	19599.8	7616.2	2391.4	841.2	19639	7473.2	-
56-0.5h	17892	5740.6	1582.4	225.4	10072.2	3060.8	12274.4	4426.2	22739	7917.4	14469.2	5432.8	12667.4	4168.2	17533.2	5593.4	15534	5025.2	20821.4	8060.6	2067.4	825.2	20583.2	7835.2	56-0.5h
56-0.5h	16794.4	5432.2	2141.6	379.6	9374	2814.8	11869.2	4332	22043.2	7606.6	14010	5195	12298	4105.4	16739	5365.2	15067.4	4884.4	20111.8	7820.2	2352	875.8	20057.2	7629.8	56-0.5h
56-0.5h	16892.8	5443	1764	333.6	9487.6	2909.8	11849	4254	21419.8	7568.8	13599.8	5087.6	12165.8	4027.6	16480.8	5306.2	14682.2	4747.2	20076.8	7813	2339.4	842.4	19828.6	7518	56-0.5h
56-0.5h	16850.4	5434.4	1305.4	171.2	8364.6	2518.4	11794.6	4201.8	21253.2	7436	13590.4	5052.6	12484.4	4207	16034	5137	14653.4	4792.2	19962.8	7711.8	2273.2	774	19879	7539.2	56-0.5h
56-1h	18428.8	5986.6	3318	726.6	11294.6	3487	11863	4236.6	21568.8	7590.8	13823.8	5074.8	13765.8	4649.4	17373	5650.2	15681.4	5157.2	19559.6	7506.6	3619	1140.8	20031	7517.2	-
56-1h	18369.8	5866.8	3072.4	685.4	10904.6	3345	11791	4201.8	21280	7376.8	13414.4	4953.2	13696.4	4608.8	17209	5554.2	15551.8	5073.2	19114.2	7302.8	2862.8	896.4	19415.2	7302.8	-
56-1h	17944.8	5803	2898.8	682.8	10482.8	3260.6	11651	4133.4	21088	7391.6	13368.8	4945.6	13452.4	4507	17110.8	5530.6	15249.2	5022.8	18672.4	7167.2	2660.6	873	19322	7276.8	-
56-1h	17833.2	5801.8	2403.2	454.2	9382	2843.4	11408	4085.4	20826.4	7268.2	13307.2	4913	13702.8	4580.2	16516.8	5278.8	15190.2	4930.2	18695.2	7077.2	2788.8	945	19030.4	7199.8	-
56-1h	17714.6	5664	3064.6	674.8	10425.6	3212.4	11449.2	4100.2	20794	7271.2	13158.4	4811.4	13410.6	4452.8	17082.6	5560	15063.6	4902.8	18269.4	7017.2	2461.6	884.6	18805.4	7134.8	-
56-1h	17777.8	5727	2849	647.8	10628.8	3226.6	11561.2	4105.6	20937.8	7244.2	13202	4903.2	13556.8	4503.4	17115.8	5427.8	15199.2	4961.6	18471.6	7076	2388.2	836.4	19115.4	7222.2	-
56-1h	18758	6033.2	3220	726.8	11121.4	3456.2	12525	4498.8	21927.6	7608.4	14116	5188.4	13909.6	4609.6	18111.4	5740.2	16033.2	5232.4	19318.2	7402.6	2878	920.4	20289	7673.4	56-1h
56-1h	17801.6	5757.4	3282	820.2	10391.2	3303.6	11903.8	4234	21485.8	7479.8	13524	5020.8	13563	4542	17274.2	5579.2	15536.2	5083.2	19335	7405	2860	994.8	19706.8	7455	56-1h
56-1h	17709.6	5720	3237	731.2	10596.2	3281.4	11621	4133.6	21087.2	7399.2	13349.2	4955.8	13403.4	4488.8	17122.2	5481.4	15388.2	5062.8	18991.6	7276.6	2707	977.8	19284.6	7253.2	56-1h
56-1h	17727.2	5723.2	2646.8	545.6	9329.4	2841.2	11534.2	4138.6	20811.8	7236.8	13284.4	4922.8	13517.4	4552.2	16245.2	5210	15085.8	4934.2	18926	7210.4	3348.2	1154.6	19546.8	7334	56-1h

## Sheet: Dataset S6
Dataset S6. Data set matrix of the differences in fluorescence intensity before and after the addition of cardiomyocyte differentiation media (0.50 vol%) containing N2/B27 supplements treated under five different conditions to the AIE-polymers. The rightmost column indicates whether the data in the corresponding row was used as training data (denoted by “–”) or test data (results of the verificat…
Analytes		pH = 7.0												pH = 5.0												Verification by Holdout test
		P-None		P-Phe		P-Nle		P-Suc		P-Pht		P-Pyr		P-None		P-Phe		P-Nle		P-Suc		P-Pht		P-Pyr
Treatment condition	Quality category	Ch1	Ch2	Ch1	Ch2	Ch1	Ch2	Ch1	Ch2	Ch1	Ch2	Ch1	Ch2	Ch1	Ch2	Ch1	Ch2	Ch1	Ch2	Ch1	Ch2	Ch1	Ch2	Ch1	Ch2
No treatment	Good	5992.2	1778.6	3631	1090.4	111	22.8	4281.8	1624.6	7585.2	2802.2	4878.4	1935	3247.6	1159	3522.6	1183.2	3947	1300.4	10117.8	4343.6	2856.6	889.8	8217	3201	-
No treatment	Good	6226.4	1830.4	3752.6	1110	-126.4	-42.6	4034.4	1524.4	7303.4	2694.6	4811.6	1856.6	3450.2	1194.4	3705.8	1216.2	4123.6	1324	10567	4493.8	2774.8	874.2	8179.8	3142.2	-
No treatment	Good	5738	1681.4	3432	1081.8	50.6	35	4074.2	1545.2	7019.8	2427.4	4695.4	1870	3220	1145.8	3396.4	1135	3836.2	1254.8	9972	4216.2	2789	816.6	8022.2	3057.6	-
No treatment	Good	6182	1789.4	3757	1153.6	19.6	-48.8	3975.4	1479.2	7235.6	2613.6	4558.4	1787.4	3410.8	1157.4	3562.4	1192.6	4048.2	1285.6	10341.2	4393.2	2741.4	920.2	8484.6	3266.6	-
No treatment	Good	5456.8	1624.6	3136	971.4	-23.4	-39.6	3870.2	1496.8	6894.6	2517.6	4554.2	1796.6	3139.2	1118.6	3402.4	1146.4	3752.6	1247.2	9567.6	4048.2	2798	816	8005	3070.2	-
No treatment	Good	5945	1721.6	3377.8	1019.6	-99.6	19.6	3992	1506.4	6981	2561.8	4568.2	1758.6	3339.6	1158.6	3500.4	1154.8	3891.4	1243.8	9972.2	4262.8	2853.2	919	8492.6	3198.6	-
No treatment	Good	5522.2	1628.4	3461	1078.2	687.2	193.6	3905	1474.4	7004.8	2554.8	4555.2	1806.4	3041.4	1093.8	3334.8	1111.2	3668.6	1207.8	9755	4135.4	3387.4	1041.2	7959.6	3075.4	-
No treatment	Good	5789.4	1669.4	3755	1133.2	668.4	179	3926.8	1464	6905.4	2545.6	4301.2	1690.6	3245.2	1099.8	3351.2	1090.6	3797.2	1239.4	10110.6	4211.2	3341.2	1037.4	8452.8	3242.8	-
No treatment	Good	5664.4	1668.6	3397.6	1036.2	-56.6	-28	4001.4	1501.2	7029.8	2622.8	4656.8	1831.2	3094	1114.8	3345.2	1118	3722.6	1226.8	9836.2	4155.8	2659.8	831.4	7878.4	3011.8	-
No treatment	Good	6006	1795.2	3574.6	1044.2	-5.8	-9.4	3978.2	1490.2	7031.2	2523.8	4632.4	1759.8	3427.8	1198.2	3529.2	1161	3951.2	1261.4	10290.6	4292.2	2699	847.2	8315	3180.6	-
No treatment	Good	5745.2	1666	3370	1008.8	161.6	3.4	3915.4	1487.4	6985.4	2588.6	4579.4	1821.2	3157	1116	3335.4	1099.8	3774.8	1245.2	9707.6	4177.8	2773	837.2	7844.4	3024.6	-
No treatment	Good	5953.2	1724.4	3536.2	1059.6	-369	-110.4	3886.8	1451.6	6986.2	2518.8	4493.2	1754.6	3247.2	1150.4	3545.4	1154.8	3888.2	1225.8	10225.2	4335.4	2865	887.8	8021.6	3073.4	-
No treatment	Good	5579.8	1616.6	2705.2	803.2	-261.2	-57.8	4030.6	1501.6	7347	2725.8	4737.6	1859.6	2916.8	1051.8	3244.2	1112.2	3670.6	1156.6	9747	4081.4	2370	654.4	8127.6	3152.4	Good
No treatment	Good	5719.8	1636.4	3067	909.8	-404	-122.2	3879.2	1430.4	6950.6	2493.4	4553.6	1759.8	3111.4	1085.6	3216	1052.8	3725.8	1181.6	9905.4	4198.2	2120.2	717.2	8508.2	3199.8	Good
No treatment	Good	5424.6	1582.8	3107.4	917.6	39.4	-6.8	3871	1461.4	7074.4	2571.6	4572.4	1789.8	3059.4	1082.2	3290.4	1105	3739.6	1229.6	9712	4133	2782.4	780.4	7989	3044	Good
No treatment	Good	5766	1649.8	3487.4	979.4	-53.2	-56.2	3962	1466.6	6954.2	2487.8	4439.6	1704.8	3348.8	1160.6	3492.2	1134.2	3830.8	1235	10218.2	4231.6	2935.4	937.2	7929.8	2982.8	Good
No treatment	Good	5695.4	1653.6	3328.4	1015.4	96.2	28.6	4055	1530.4	7185.2	2632.8	4704.6	1835.8	3146.2	1135.8	3372.2	1108.2	3726	1191.6	9876.8	4179.2	2615	815.4	7932.8	3007	Good
No treatment	Good	5908	1706.6	3665.8	1094.4	-120.4	-25.4	3978.2	1500.2	7229.8	2611.4	4594.2	1776.8	3328.6	1162.6	3619	1176.6	3896.8	1265.2	10242	4282.6	2806	898	8510.8	3205	Good
45°C	Good	6407.8	1824.2	3973.4	1202.4	-194.6	-36.4	4245.2	1556.8	7514.2	2717.4	4918.4	1919.6	3493.2	1195.6	3612.8	1196.8	4224	1369	10501.4	4401.6	2796.6	906	8808.6	3393.8	-
45°C	Good	6416.8	1868.4	3733.6	1096.6	-125	-41.4	4067.6	1522.6	7390.4	2675.2	4740	1874.4	3497.2	1243	3700.6	1206.6	4078	1321	10552.4	4441.6	2408.6	769.2	8901.2	3396	-
45°C	Good	6211.2	1798.4	3793.8	1118.2	-70	-13.4	4045.6	1498.8	7309.8	2607	4740.6	1809.4	3411	1186	3537	1165.4	4188.8	1325.6	10391.8	4383.8	2966.4	949	8305.6	3156.8	-
45°C	Good	6282.2	1836.4	3702.4	1063	-227.4	-115.8	3984.8	1453.6	7329.8	2612.4	4668.8	1815.6	3483.2	1198.2	3697.4	1220.4	4097.6	1304.2	10341.2	4340	2819.6	954	8857.6	3343.6	-
45°C	Good	5984	1710.6	3522.6	1014.4	-25.6	5.6	3887.6	1472.2	6886.8	2461.4	4535	1725.8	3270.4	1126.8	3496	1143.4	4089.6	1285	9964.2	4088.4	2898.4	923.8	8326	3128.2	-
45°C	Good	5851	1712.2	3547.8	1059.2	-98.4	-30.4	3936.8	1435.8	7091.8	2570.6	4617.8	1757	3325.2	1160.6	3523.4	1135.6	4030.6	1290	10057.2	4238	2847.4	906.2	8628.8	3253	-
45°C	Good	5925.6	1680	3830.4	1136.8	722	187	3927.4	1460	7061	2506.4	4565.8	1763.2	2511.2	848	3480	1147.6	3837.4	1256.6	10210.8	4209.6	3819.4	1182.6	8346.6	3157	-
45°C	Good	5750.8	1697.6	3859	1135	712.2	164.6	3830.8	1426.8	7095	2562	4345.6	1691.8	3270.8	1139.2	3493.2	1117.8	3852.2	1220.8	10272.2	4244.6	3462.4	1062	8422.2	3259.8	-
45°C	Good	6090.2	1730.6	3836.8	1133.2	206.8	74	4036.6	1512.4	7262.8	2631.4	4650.8	1802.2	3286.4	1158.4	3546.6	1162.8	3976.6	1261.8	10030.2	4215.8	2868.4	987.4	8065	3061.2	-
45°C	Good	6130.2	1802	3653	1090.2	-65.8	-43	3910	1460.6	7221	2628.6	4626.4	1785.6	3549	1224.8	3529.6	1157.2	3980.8	1271.6	10014.8	4234.4	2806.2	909.4	8496.8	3219.4	-
45°C	Good	6162	1755	3702	1058	44.2	-16	3886.4	1416.4	7113	2574.8	4604.2	1806.2	3318.2	1177	3442.4	1117	3968.4	1258.2	10041.2	4217.8	2967.2	920	8312.8	3137.4	-
45°C	Good	6063.6	1754.8	3731	1100.6	1	-27.8	3843.2	1433.2	7226.8	2610.4	4509	1749.6	3392.6	1219	3484	1144	3913.6	1265.4	10135	4274.6	2736.6	897.2	8480.4	3227.4	-
45°C	Good	5872	1705.8	3280	952.4	-239.2	-61.8	3986.4	1452.8	7231.6	2557.6	4663.4	1770	3024.2	1048.4	3307.6	1091.2	3802.4	1197.4	10293.6	4267.8	2642.8	846.4	8463.8	3239	Good
45°C	Good	5764.8	1651.4	3134.2	925.8	-289.2	-109.8	3795.4	1390.8	7163.8	2567.8	4637.2	1749.6	3150.2	1103.8	3205.8	1055	3737.4	1206	10378.4	4250.6	1801	598.8	8781.2	3325.4	Good
45°C	Good	5967.6	1708.2	3546.6	1038.6	85.2	-4	3976.2	1442.2	7184	2600	4660	1776.2	3226	1118	3590.4	1147.8	3940.8	1273.8	10170.2	4191.4	3053.6	934	8454	3164.6	Good
45°C	Good	5827.8	1679	3508.6	1021.8	-65.8	-35.4	3679.2	1381.6	7255	2596.6	4622.8	1769	3372.6	1176.4	3481	1123.8	3980	1303.8	10396.8	4270.4	2685.8	910.8	8589.2	3239.4	Good
45°C	Good	6153	1783.6	3853.6	1133	107.2	26	4012.6	1502.4	7385.4	2674.4	4797.8	1823.2	3337.2	1165.8	3528.6	1135.8	3924.4	1248.4	10051.6	4158	3140.8	991.8	7959.8	2979.6	Good
45°C	Good	6161.2	1749.4	3719.8	1102	6.2	-42.8	3897.8	1461	7444.4	2669.2	4677	1778	3443.2	1199	3587	1183	4040	1270.8	10238.6	4269.2	2549.4	843	8676	3277.6	Good
55°C	Acceptable	6711.6	2195.8	4355.2	1263.6	1161	349.4	2454	846.4	5275	1771.4	2750	1004.8	4812.4	1774.4	4951.2	1569.2	5278.8	1735.6	7489.4	2616.6	2400.4	643	7528	2566.4	-
55°C	Acceptable	6891	2256.4	4252.8	1219.4	1106.6	258.6	2324.8	819.6	5139.4	1686.4	2544	926.8	4856.4	1808.6	4862.4	1562.6	5069.6	1669.8	7445.2	2586.2	1790	522.8	7625.4	2589.4	-
55°C	Acceptable	6550.2	2150	4125	1260.6	1311.2	328	2489	851.4	5320	1733	2706.6	997.6	4705.6	1768.2	4847.8	1547.2	5290.4	1693.6	7459.2	2576.6	2073.6	668.2	7346	2465.6	-
55°C	Acceptable	6845.6	2213.2	4241.6	1305.2	1330.2	353.2	2281.6	813.2	5149.6	1685	2489.2	906.8	4626.8	1756	4791.6	1555.6	4940.2	1622	7179.2	2485	2330.8	614.2	7500.6	2553.4	-
55°C	Acceptable	6231.6	2044	4330.4	1280.6	1033.8	271.4	2232.4	771.6	4985	1630.4	2583.6	906.4	4567.6	1697	4687.4	1531.2	5159.8	1645	7260.2	2477.4	2399	653	7270	2439.6	-
55°C	Acceptable	6543.2	2140	3989.8	1146.8	1134.8	300.6	2315.2	837.2	4885.6	1636.4	2517	908.6	4615.6	1719	4661.8	1512.2	4832.8	1569.6	6867.6	2379.6	2050	440.2	7460.8	2538.4	-
55°C	Acceptable	6257	2030.8	4554.2	1327.4	1850.8	501.8	2326.4	843.4	5105.8	1681.6	2643.6	954.6	4516.8	1676.2	4651.8	1496.2	4984.8	1598.2	7342.4	2526	3168.6	869.6	7235.6	2397.2	-
55°C	Acceptable	6327.8	2050.4	4415.2	1333.4	2040.4	536	2259.2	783.6	4943	1645.8	2413	875.2	4551.4	1680	4656.2	1502.4	4121	1318.8	7143.4	2445.6	2941.2	827.2	7184.8	2440.8	-
55°C	Acceptable	6499.4	2154.4	4202	1238.8	1254	328	2319.6	785.8	5166	1694.8	2685.6	963.2	4596.6	1728.8	4706.2	1509.8	4981.2	1636.2	7253.4	2503	2099.8	609	7185.8	2417.4	-
55°C	Acceptable	6491.2	2144.6	4066.4	1208.2	1259.2	386.2	2227.4	787.4	4994.8	1626	2486	900.8	4634.2	1715.2	4750.6	1513.2	4803.4	1563.4	7116.8	2432.8	2176.2	565	7208.4	2419.6	-
55°C	Acceptable	6569.6	2123.4	4167.8	1202.6	1226.6	339.6	2291.8	785	5175.6	1670	2613.8	952.2	4586.6	1719.6	4747.4	1520.2	5027.2	1597.2	7186.8	2455.2	2486.2	726	7128.4	2351.4	-
55°C	Acceptable	6565	2173	4191	1191	2052.8	714.6	2123.4	739	4867.8	1605.6	2379.6	877.6	4573	1724.4	4657.6	1513.6	4805.6	1577.8	7142	2454	2335.8	644.2	7410.4	2485.8	-
55°C	Acceptable	6126	2002.6	3916.2	1111.8	1054	235.2	2275.6	772.6	5209	1679.8	2621	936.4	4438.6	1651	4491.4	1438.6	4760	1541.2	7188	2452	1822.8	478	7418.6	2459.2	Acceptable
55°C	Acceptable	6314.4	2092.6	3684.6	1093.8	844.8	192.2	2221.4	779.2	4834.2	1570.2	2513	912.2	4338.6	1617.4	4525.4	1447.8	4555.8	1435.6	7077.8	2441.6	1629.4	424.4	7463.6	2481	Acceptable
55°C	Acceptable	6250.8	1991.8	4132.2	1225.2	1224.4	335.4	2229.8	769.8	5155.2	1646	2581.4	926.4	4502.8	1686.6	4614.2	1457.6	5080.2	1610.2	7190.6	2480	2615.6	673.8	7355.8	2448.2	Acceptable
55°C	Acceptable	6393.4	2099.4	4078.6	1226.6	1202.4	336.4	2158	754.8	4795	1583.4	2479.8	891.4	4431.8	1657	4531	1459	4774.2	1514	6993.4	2401.8	1635	436.4	7524.4	2526.6	Acceptable
55°C	Acceptable	6541.4	2123.6	4112.4	1192.4	1272.6	345	2309.6	797.2	5146.2	1670	2680.2	947.6	4610.6	1699.6	4677.2	1499	5066.6	1643.6	7092.2	2402.2	2468.2	696.4	7070.8	2362.2	Acceptable
55°C	Acceptable	6501.4	2114	4234.4	1266.2	1092.8	308	2185.8	788	5014.4	1632.6	2436.4	893.4	4545.4	1688.4	4789.8	1520.4	4848.2	1558.2	7056.6	2487.4	2338.6	624.2	7307.2	2460.2	Acceptable
65°C	Unacceptable	108.4	75.2	-508.8	-166.8	-1486.8	-449.6	88.4	79.8	646.8	262.8	124	88	61.2	68.4	124.6	74.4	48.4	44.4	-73.4	35.8	-607	-216.6	667	266.8	-
65°C	Unacceptable	94	67.8	-602.8	-172.6	-1407.4	-368.2	123.4	89.2	653.4	269.2	139	88.4	71.6	62.8	117.8	80	88.8	76	-275	-13.4	-760	-221	371	171	-
65°C	Unacceptable	81	75.4	-555.6	-154.4	-1320.4	-405.2	127	77.8	665	258.8	150.6	82.8	64.8	66.4	108.4	71.4	17.4	66.6	-85.6	27.4	-803.2	-229.2	400.2	189.8	-
65°C	Unacceptable	93.2	83.6	-602.4	-179	-1283.6	-405.6	92.8	80.6	636	262.8	124	82.8	88	74.4	59.2	64	77	73.8	-137.4	5.6	-369.4	-140	474.6	204	-
65°C	Unacceptable	78.6	62.6	-630.8	-182.2	-1293.2	-380	70.2	68.2	614.4	235.6	106.8	78.8	69.2	48.6	86.6	76.2	78	54.2	-229.6	-31.2	-328.2	-83.8	336.6	144	-
65°C	Unacceptable	76.6	66.2	-516.4	-161	-1014.6	-309	94.2	68.2	571.8	242.2	104	83.4	82.6	64.8	84.8	76.6	65	66.4	-222.6	-45	-697	-211	399.4	170.4	-
65°C	Unacceptable	122.6	79	-112.2	9.8	-442.6	-170	169.4	98.2	693	274.6	147.4	82.4	118	77.8	210.8	112.6	160.6	92.2	248.8	108.6	158.8	11.2	482.8	201.4	-
65°C	Unacceptable	109.2	79.8	-61.4	10	-314.4	-128.6	155.4	88	664.6	256.4	147.2	93.2	90.2	79	198.2	94.8	162.8	81.4	208.6	90.6	262.8	32.6	449.4	188	-
65°C	Unacceptable	90	69	-641.4	-187.2	-1071.2	-330.8	104.2	63.2	604	240.2	128.8	86.8	81.4	63.2	102.6	69.4	79.4	64	-183	-10	-722	-260.2	460.2	187.8	-
65°C	Unacceptable	81	66.2	-232.4	-57.2	-996.2	-271.8	99.6	71.4	587.2	222.6	116	78.4	76	64.2	97	66.4	82.6	86.2	-126	-5.8	-305	-93.2	416.8	191.4	-
65°C	Unacceptable	79.8	73.4	-609	-171	-1018.6	-265.4	95.2	70.6	598.4	241.2	214	88.6	60.2	65.2	104.8	80.6	42.2	51.2	-124.6	14	-412	-89	363.6	157.4	-
65°C	Unacceptable	82	67.2	-493.8	-138.4	-1093.6	-329.8	119.2	84.4	725.2	288	132	92	74.2	71	91.2	71.6	60.2	65.8	-296.6	-45	-174.6	-89.8	287.8	143.8	-
65°C	Unacceptable	70	64.4	-682.4	-202.6	-1259.4	-397.2	27	43.6	618.8	256.6	104.2	95.2	47.2	53	39.4	44.4	7.6	43.8	149.2	82.8	-632.6	-190.6	400.8	181.4	Unacceptable
65°C	Unacceptable	70	75	-683.4	-188.8	-1543.4	-427.6	87.6	74.6	599.4	234.2	127	98.4	10.6	56.6	74.2	58.2	29.4	52.8	-116.8	12.4	-832.2	-246.2	352.8	159.4	Unacceptable
65°C	Unacceptable	82.2	61.4	-478.2	-107.4	-1138	-341	114.6	79.2	606.6	249.4	148.2	92.4	57.6	58	125.4	79.2	71.2	46.2	-217	-51.6	-372.6	-99.4	353.4	150.8	Unacceptable
65°C	Unacceptable	83.6	69	-510.8	-141.4	-1256.2	-355.6	99.8	81.8	643.4	234.8	112	77	43.4	62.6	75.2	75.8	73.2	75	-266.4	-22.4	-332.8	-131.8	369.4	168.4	Unacceptable
65°C	Unacceptable	82	58	-556.8	-133.4	-1054.4	-278.8	128.6	89.2	637.8	241.8	134.2	95.4	49.8	56.8	133	87.6	85.2	57.2	-84.4	48.6	-53	-26.2	386	177.4	Unacceptable
65°C	Unacceptable	109.4	78.4	-470.8	-131.2	-1076.6	-286.8	127.6	79.2	646.2	254.4	115.2	84.2	48.6	53	134.4	90.4	80.8	59.2	-235.8	-3.8	-705.2	-206.4	365.8	156.4	Unacceptable
75°C	Unacceptable	65.6	77.2	-625.6	-168.8	-1150.4	-327.2	93.4	80.2	646.4	257	132	83.4	37.2	47.8	81.4	73.2	2.2	42.4	-201	-4	-506.6	-138	386.8	163.2	-
75°C	Unacceptable	66.4	49.6	-546.8	-134.4	-1066.8	-287.4	99.6	79.2	670.8	280.4	132.6	91.2	45.6	63.6	83.6	80.6	24	51.6	-320.4	-32	-645	-168.4	254.8	128.6	-
75°C	Unacceptable	64.6	61.2	-574.6	-134.8	-997.4	-347.2	141.2	79.2	667	247.8	117	86	26.2	49	120.2	83	20.2	39.6	-121.6	2	-88	1	301.8	150	-
75°C	Unacceptable	78.2	58.6	-620.8	-145.4	-1040.8	-336.6	130.8	77	664.6	267.2	129	83.2	25.8	51	61	84.4	8.8	31.4	-190	-24	-550	-168	321	156.6	-
75°C	Unacceptable	73.2	51.4	-587.4	-188.4	-1079	-289.2	125.4	80.6	619.2	235.4	133.6	87.4	22.6	49.4	68.4	67.2	17.8	56.8	-259.6	-45.8	-468.4	-149.6	236.8	119.8	-
75°C	Unacceptable	63.8	53.8	-557.4	-126.2	-994.8	-273.2	106	67.2	631.2	250.6	116.6	86.6	16	57.2	54.8	59.6	52	36	-291.6	-32.4	-638.6	-190.6	289.2	152.2	-
75°C	Unacceptable	130.8	76.2	-55	8.4	-352.6	-110.4	151	76.6	682.6	273.2	144.2	90.8	82.4	63.8	148	107.8	111.4	90.4	205.2	113.6	156.2	19.2	375.4	159.8	-
75°C	Unacceptable	84.8	70.8	-167	-39.6	-511.8	-145.2	139.2	84.6	674.4	249.4	150	94.8	89.4	57.6	189.2	106.8	115.6	74.8	169.2	80.6	191	13.8	385.8	169.8	-
75°C	Unacceptable	91.2	70.8	-404.2	-96.4	-747.2	-224.4	104.2	88.8	633	258.8	103.4	79.2	43.2	54.4	62.8	56.6	16.4	49.6	-209.4	-18.2	-489.8	-152.4	314.6	147.4	-
75°C	Unacceptable	84	62.2	-499.8	-121.4	-1029.2	-285.6	107.6	81.6	649	259	121	88.8	21	62.6	38.4	44	37	43.6	-264.4	-67.8	-305.8	-32	295.4	136.4	-
75°C	Unacceptable	77.6	59.8	-479	-102.2	-806	-216.2	134.4	79	664	246	114.4	95.2	37	38	90.6	59.4	31.4	29.4	-104.4	2.4	-301.6	-52.2	268.2	151	-
75°C	Unacceptable	70.8	57.6	-580	-150.4	-1098.4	-323.6	111.4	82.8	679	269.2	136.4	88.4	18.8	57.2	92.6	65.4	55.8	55	-288.6	-49.6	-270.8	-128.2	227.6	122.2	-
75°C	Unacceptable	67.6	60.6	-555.8	-138.8	-1041.2	-284.6	94	79.8	658.8	259.2	136	88	15	38.8	45.8	54	22.8	31	-193	-30	-773	-193	349	164.2	Unacceptable
75°C	Unacceptable	32.4	53.2	-664.8	-155	-1336.4	-327.6	106.8	84.4	641.2	251.2	127.4	84.8	-22.6	39.2	31.8	47.6	26	41.6	-311.6	-34.6	-703	-268.2	233.2	128.8	Unacceptable
75°C	Unacceptable	64	63	-517.2	-155	-828.2	-252.8	122	77.6	624.4	252.8	147.4	89.2	28.8	55.2	84.2	57.4	-7.8	48.2	-292.4	-66.6	-673	-153.8	252	125.4	Unacceptable
75°C	Unacceptable	71	52.8	-566.2	-147.6	-1248.6	-316.2	105.2	46	653.6	263.6	133	98	23	47	62	53.4	15	31	-324	-26	-827.2	-247.6	242.4	125.8	Unacceptable
75°C	Unacceptable	77.6	65.8	-515.8	-164.8	-934.4	-282	125	91.4	648.2	260.8	126.8	77.8	34.4	63.6	94.8	60.2	49.6	61.4	-173.6	-20.4	23.4	-12.4	291.4	150.2	Unacceptable
75°C	Unacceptable	90.6	64.4	-528.6	-141.2	-846.6	-233	113.8	80	676.6	282	125.6	95	20.2	46.4	67.8	55.2	19.2	50.4	-289.2	-58	-897.8	-213.8	242.4	122.8	Unacceptable

## Sheet: Dataset S7
Dataset S7. Data set matrix of the differences in fluorescence intensity before and after the addition of supplements (0.02 vol%) stored for different periods to the AIE-polymers.
Analytes	pH = 7.0												pH = 5.0
	P-None		P-Phe		P-Nle		P-Suc		P-Pht		P-Pyr		P-None		P-Phe		P-Nle		P-Suc		P-Pht		P-Pyr
	Ch1	Ch2	Ch1	Ch2	Ch1	Ch2	Ch1	Ch2	Ch1	Ch2	Ch1	Ch2	Ch1	Ch2	Ch1	Ch2	Ch1	Ch2	Ch1	Ch2	Ch1	Ch2	Ch1	Ch2
In-date_1	6817.7	1923.1	3507.2	1252.5	2933.7	893.8	4540.8	1555.9	-200	-149.7	7084.4	2334.7	3961.9	1519.4	11115.5	4751.2	8750.9	3429.1	3660.6	1223.6	5099.7	2044.8	10038.5	4010.8
In-date_1	7283.1	1999.2	3616.9	1246.4	3196.3	958	4659.6	1545.6	-860	-317.4	7436.1	2392	3903.3	1444.8	11321.3	4777.3	8690.7	3338.3	3705.2	1229.3	5137.9	2009.1	10348.8	4004.8
In-date_1	6869.3	1916.2	3543.3	1275.1	3125.9	969.1	4622.4	1562.5	-46.7	-111.4	7427.8	2456.6	3766.4	1442.7	11370	4827.2	8378.2	3272.1	3732.5	1221	5101.1	2056.4	10216.3	4058.4
In-date_1	7060	1909.2	3745.1	1284.9	3137	967	4723.5	1564.6	-611.5	-258.3	7926.2	2583.9	3744.6	1404.3	11796.9	4939.3	8239.1	3182.8	3939.5	1268.7	5014.1	1987.1	10541.3	4118.8
In-date_1	6935.7	1973.9	3560.1	1258.3	2956.9	912.8	4558.7	1537.2	155.2	35.1	7230	2387.3	3773	1439	10939	4655	8763.8	3424.6	3684.4	1173	5201.5	2064.7	10117	4053.9
In-date_1	7005.3	1914.8	3686.8	1283.7	2996.4	911.4	4605.8	1534.5	-750.7	-292.6	7552.9	2413.6	3614.6	1352.5	11422.5	4764	8216.6	3141	3909.2	1281.4	4951.9	1954.7	10295.8	4037.9
In-date_1	7233.6	1971	3719.7	1315.9	3374.2	1013.2	4773.2	1593	-664.5	-262	7486.4	2416.3	3902.4	1482.7	11807.3	5030.8	8565.9	3315.5	4094.8	1356.6	5238	2079.4	10449.5	4144.7
In-date_1	7428.4	2010.7	3832.4	1344.6	3306.6	1003.2	4870.3	1613.1	-834.7	-351.8	7695.1	2482.9	3924.4	1472.6	12039.4	5044.3	8863.5	3390.8	4223.5	1392.8	5348.1	2074	10579.9	4154.7
In-date_1	7272.2	2000.5	3749.9	1317.4	3238.2	999.2	4793.6	1589.9	-554.9	-231.1	7539.5	2454.6	3877.6	1465.5	11476.8	4854.1	8758.7	3324	3517.3	1215.9	5214	2039.8	10343	4094.7
In-date_1	7347.1	1994.1	3831.4	1336.1	2901	895.2	4785.8	1579	-1172.8	-456.1	7707	2468.5	3818.9	1431.3	11800.1	4955.1	8754.8	3342	4339.5	1384.5	5266	2057.8	10521.4	4101.9
In-date_1	7137.1	2001.1	3627.2	1293.4	3240.2	1012.2	4585.3	1527.5	-189.7	-101.2	7313.5	2383.6	3808.9	1441.3	10886.4	4625.6	8761	3388.1	3232.7	1093.7	4956.3	1944.2	9845.5	3866
In-date_1	7242.9	1960.2	3722.3	1286.6	2992.8	904.2	4535.8	1494.6	-736.7	-296.5	7553	2436.2	3886.2	1467.1	11231.3	4689.4	8555.9	3324.7	3773.4	1217.2	5065.9	1980.5	10079.8	3944.1
In-date_2	7237	1968	3795.8	1318.6	3519.3	1055.8	4844.3	1603.1	-1018.9	-390.5	7778	2498.9	3960.1	1470.6	11629.3	4874.1	8813	3372.3	3098.5	1044.8	5165.7	2010	10190.8	4035.2
In-date_2	7280.8	1970	3745.8	1287.5	3423	1028.3	4868.1	1598.1	-948	-391.3	7587.6	2475.2	4066.9	1530.2	11650.9	4899.4	9241.8	3512.1	3791.5	1280.9	5320.9	2070.4	10201.1	3999.9
In-date_2	7260.3	1990.7	3885.6	1343.7	3079.6	935	4913.1	1619	-1001.4	-396.2	7929.4	2562.8	3762.7	1417.2	11752	4908.5	8835.4	3390.1	3623.5	1189.9	5114.3	1993.1	10499.4	4150.6
In-date_2	7297.9	2031.1	3940.6	1370.9	3295.9	982.8	4878.9	1610.1	-754.7	-332.6	7732	2490.3	3962.9	1468.7	11822	4931.3	9264.8	3558.2	3637.5	1213.8	5370.5	2083.2	10629.4	4207
In-date_2	6969	1902.1	3814.7	1318.8	3138.1	965.1	4802.2	1589.9	-1125.1	-417.1	7627.6	2459.1	3769.4	1402.2	11392.6	4738.7	8280.7	3172.5	3461.9	1165.9	5014.9	1953.6	9997.9	3944.5
In-date_2	7123.7	1927.4	3891.3	1348.5	3274.5	986.1	4747.5	1554.3	-831.1	-324.1	7939.1	2561.8	3954.2	1489.2	11769.5	4892.9	9254.9	3542.6	3666.9	1204.4	5315.9	2064.2	10311.9	4063.6
In-date_2	7285.6	1964.8	3896.5	1370	3301.6	985.7	5078.4	1666.3	-953.9	-375.5	7913.8	2539.8	3932.9	1484	12047.7	5051.7	8595.8	3304.2	3163.5	1061.6	5202.6	2001.7	10707.3	4248
In-date_2	7325.8	1998.1	3799.8	1309.1	3042.6	921.5	4880.3	1614.5	-1121.8	-418.5	7762.2	2511.5	3994.8	1490.8	12284.4	5171.4	8939.8	3427.3	3489.5	1165.5	5346	2096	10609.6	4230.6
In-date_2	7107.8	1919.3	3896.9	1358.1	2960	877.2	4926.9	1621	-1129	-380.1	7693.7	2475.4	3929.2	1459.4	11786.4	4929.8	8617.7	3278.4	3387.8	1164.5	5071.4	1983.3	10442.7	4239.9
In-date_2	7149.3	1949.1	3832.9	1319.9	2977.8	892.3	4851.6	1596.9	-1113.8	-419.4	7701.6	2499.9	4000.1	1506.1	11610.8	4860.1	8527.5	3282.9	3359.8	1173	5428	2112.5	10532.3	4207.9
In-date_2	7340.8	1993.8	3869.4	1329.5	3144.4	958.4	4967.3	1631.8	-926.8	-325.6	7794.5	2532.8	4010.6	1498.3	11731	4921.1	8817.2	3393.6	3599.9	1260.7	5025.6	1949.5	10295.1	4068.5
In-date_2	7314.5	1991.6	3911.5	1349.6	3163	947.3	4822.6	1605.9	-1049.3	-383.1	7623.9	2463.6	4025.1	1501.3	11711.9	4936.1	9154	3506.9	3715.6	1208.3	5354	2090.6	10334.7	4121.1
In-date_3	7372.9	2046.2	3852.7	1347.9	3348.7	999.1	4825.2	1604.9	-669.1	-291.6	7790.8	2492.7	4133.9	1527.9	11757.2	4949.2	8516.3	3285.2	3547.6	1156.3	5100.7	1975.3	10143.6	3894.1
In-date_3	7370.4	2057.7	3846.3	1335.8	3585.8	1126.2	4895.4	1614.4	-994.1	-376.8	7826.9	2511.7	4085.7	1524.2	11773	4955	9211.6	3485	3637.1	1216.9	5412.7	2096.1	9981.1	3834.7
In-date_3	7233.7	2007.5	4028.6	1391.1	3417.4	1023.2	5009.4	1663.5	-867.3	-346.8	7935.7	2553.4	4024.2	1499.1	11979.3	5006.3	9103.3	3521.2	3509.2	1136	5230.7	2052.2	10727.2	4181.8
In-date_3	7387.8	2081.1	4006.9	1401.8	3512.7	1063.6	4933.1	1620.4	-844.3	-353.9	8009.5	2569.2	4068.2	1527.4	12069	5050.4	8925.7	3421.3	3311.4	1091.4	5569.7	2162.4	10464	4068.3
In-date_3	7154.2	2022.5	3871.4	1356.3	3384.9	1005.1	4858	1580.9	-821	-343.9	7716.4	2493.2	4054.1	1498.7	11310.7	4715.6	8417.6	3215.6	3472.1	1154	5519.1	2155.2	10245.2	4013.2
In-date_3	7085.8	1982.8	3922.9	1337.7	3184.5	960	4922	1609.2	-651.3	-308.7	7832.1	2506.2	4011.1	1468.3	11828.7	4912	8725.1	3301.8	3289.4	1070.6	5250.3	2053	10159.4	3913.2
In-date_3	7348.2	2030	3862.7	1343	3277.9	996.9	4843	1610	-925.7	-371.1	7706.9	2488.7	3806.2	1412.1	11638.6	4868.6	8549.7	3286.2	3847	1274.9	5058	1976.5	10204.6	3936
In-date_3	7248.1	2037	3886.5	1334.2	3358.9	1003.9	4850	1591.7	-1106.7	-448.4	7651.9	2466.5	3968.1	1467.4	11637.2	4879.7	8761.8	3340.5	3745.8	1242.4	5402.4	2094	9958.9	3821.5
In-date_3	7036	1920.7	3900.6	1349.5	3102.8	920.4	4799.2	1580.7	-942.9	-328.6	7486.8	2397.2	3963.7	1476.1	11372.4	4781.9	8481	3228.2	3079.7	1080.9	5169	2006.4	10348.7	4096.8
In-date_3	6980.1	1881.5	3833.3	1331.1	2903.3	874.6	4878.4	1615.7	-1115.4	-404.2	7627.1	2449.6	3868.4	1430.4	11564.1	4862.9	8801.7	3376.5	2940.3	1016.1	5271.1	2043.9	10206.4	4000.9
In-date_3	7056.3	1947.8	3879.7	1336.2	3278.1	988.4	4912.9	1609.5	-1060.2	-387.2	7775.8	2486.5	3982.7	1502.3	11262.5	4722.1	8521.1	3261	3407.8	1120.4	5058.3	1962.3	10405.6	4081.5
In-date_3	7701.9	2318.7	3833.7	1336.7	2926.3	908.9	4869.1	1602	-1222.4	-462.5	7670	2446	3926	1466.9	11423.1	4776.3	8581.4	3300.8	3362.8	1159.4	5281.9	2055.4	10003.9	3893.1
Expired_1	6782.3	1887.1	3548.4	1238.6	3106.7	931.4	4430	1488.3	-110	-131.7	7168.9	2314.2	3705.5	1433.3	11597.2	4835.1	8767.5	3345.5	3186.2	1000.5	5038.5	1988.3	10002.6	3827.2
Expired_1	6998.8	1950.2	3735.8	1301.9	3074.3	920.3	4708.3	1584.4	-681.4	-278.9	7494.8	2421.3	3872.9	1447	11437.1	4802.6	8651.1	3326.2	3352.2	1079.4	5152.3	2036.5	10160.8	3971.6
Expired_1	6813	1877.2	3624.1	1267.3	2944.5	888.1	4560.7	1513.7	-778.9	-340	7267.9	2359.5	3536.5	1332.8	11450.4	4811.2	8320.4	3208.1	3640.9	1157.9	4789.6	1901.7	9956.4	3867.6
Expired_1	6776	1867.8	3812.6	1321.5	2903.2	860.2	4769.5	1570.7	-1028	-403.8	7517.1	2436.7	3684.8	1395.4	11245.6	4700.9	8242.6	3164.8	3513.9	1109	5057.6	1976.9	10290.7	3997.8
Expired_1	6703.3	1835.2	3535.4	1223.9	2886.7	872.3	4454	1483.3	-567.5	-206.3	7009.8	2297	3636.5	1362	11237.8	4699.3	8059.1	3090.9	3762.6	1214.4	4893.1	1923.3	9805.1	3758.4
Expired_1	6590.4	1791.1	3660.4	1280.7	2669.6	793.9	4651.2	1556.4	-1144.5	-443.1	7127.7	2326.6	3478.6	1305.4	10674.9	4487.1	8037.2	3077.6	3453.8	1112.9	4848	1894.7	10014	3881.3
Expired_1	7235.8	1986.8	3631	1262.8	3090.5	941	4700	1570.4	-1143.4	-415.3	7274	2360.5	3504.5	1320.9	11725.4	4922.5	8486.6	3284.7	3744.2	1213.6	5088	2018.1	10078.8	3854
Expired_1	7095.5	1959.2	3795.2	1304.3	2999.3	888.5	4952.5	1635.2	-1343.1	-491.5	7579.5	2465.2	3896.1	1459.5	11643.4	4929.7	9104.6	3500.7	3829.6	1274.4	5330.1	2089	10475.3	4028
Expired_1	7019.6	1918.9	3701.6	1280.9	2927.7	874.2	4656.1	1545.7	-914.9	-384.9	7220.1	2314.5	3580.9	1349.6	11306.8	4765.5	8108.7	3097.2	3609.4	1116.8	4999.5	1965.1	9888.6	3758.3
Expired_1	7239.3	1995.5	3753.4	1304.5	2896.2	878.4	4378.9	1380.1	-1742.7	-598.6	7354.9	2377.3	3659.2	1373.1	11190.3	4718.4	8664.7	3334.9	3732.8	1219.8	4999.1	1972.3	10261.1	3981
Expired_1	6911.6	1997.6	3619	1249.8	2907.2	886.2	4467.1	1494.5	-534.2	-196.2	7171.2	2328.9	3547.6	1333.4	10891	4579.6	7766.8	3001.7	3264.2	1033	4801.3	1905.3	9644.1	3695.5
Expired_1	6688.1	1872	3635.2	1260.5	2819.9	853.8	4543.8	1512.7	-1062.2	-411.4	7234.5	2361.9	3515.6	1305.9	11010.8	4592.6	8398.7	3247.6	3237.9	1040.5	4839.8	1888	10014.6	3859.3
Expired_2	7251.6	2046.2	3825.4	1322	3587.7	1077.2	4879.4	1613.5	-779.9	-330.2	7712.2	2488	3991.1	1489.2	11385.7	4807.7	8737.8	3358.5	3075.7	1025.3	5141.6	2010.9	10091.6	3858.6
Expired_2	7031.8	1979	3897.2	1342.2	3397.6	1023.7	4745.9	1562.7	-913.3	-327	7431	2408.2	3947.6	1480.3	11470.5	4820.2	9099.1	3474.7	3049.6	1042.4	5343.4	2088.5	9909.5	3749.8
Expired_2	7166.4	2020.8	3890.2	1349.9	3205.8	976.1	4543.9	1500.7	-996.2	-397.7	7379.3	2401.2	3781.2	1416.5	11264.6	4758.8	7720.3	2978.8	2985.8	1005.9	4940.2	1936.3	10457.1	4037.8
Expired_2	7175.2	2013.7	3929.2	1360.9	3303.5	994.3	4677.6	1561	-1379	-487.5	7476.5	2413.6	3834.6	1432.8	11412.5	4815.2	8469	3235.2	2801.3	956.9	5284.8	2052.9	10210.3	3942.9
Expired_2	6893.8	1942	3794.6	1320.7	3405.5	1024.1	4650.6	1526.2	-930.5	-373.2	7153.6	2307.4	3846.5	1430.5	10922.8	4630.6	8281.6	3176.6	2846.4	947.1	4804.7	1889.1	10054.9	3852.5
Expired_2	6741.5	1866	3804.7	1319.7	3404.1	1027.7	4655.7	1552.6	-1011.2	-390.5	7436.6	2384	3870.7	1438.4	11088.5	4664.1	8187.6	3096.5	2940.8	1007.5	5094.7	1990.6	9932.8	3828.4
Expired_2	7021.6	1947.4	3701.4	1305.1	3185.9	960.9	4612.9	1519.2	-1245.1	-480	7138.6	2287.7	3635.9	1360.3	11773.9	4948.8	8002.9	3077.4	2991.6	1057.1	4967.6	1951.4	9863.8	3749.3
Expired_2	7131.8	1971.6	3800.8	1314.9	3010.8	907.2	4698.9	1577.3	-1019.4	-389.2	7193.7	2338.9	3972.7	1478.2	11352.5	4763.9	8793.2	3386.2	3508.7	1131.7	5149.7	2011	9925.5	3801.3
Expired_2	6741.8	1868.5	3699	1292.2	2880.6	864.3	4436.9	1480.8	-1056.6	-397.5	7250.3	2335.2	3798.3	1411.9	10708	4534.1	7797.8	2998	2431.3	844.1	4705.2	1842.7	9905.8	3897.2
Expired_2	6643.4	1837.5	3668.4	1270.2	2737.1	829.5	4456.5	1482.2	-1068	-433.2	7055.5	2289.5	3878.6	1438.3	10808.5	4553.3	8155.2	3125.5	3148.9	1031.5	5123.5	2004.5	9970.3	3891.1
Expired_2	6759.7	1883.4	3766.1	1316.4	3110.1	937	4510.6	1505.6	-1465.6	-502.8	7122.5	2296.9	3839.3	1441.3	10219	4334.5	7583.9	2935	2631	918.4	4814.7	1880.4	10002.7	3941.6
Expired_2	6719.1	1876.6	3691.1	1281.5	2789.9	837.3	4518.5	1499.7	-1350.9	-451.6	7127.6	2290.8	3803.9	1412.5	10776.3	4528.6	8256.9	3191.6	2987.7	983.4	5031.8	1962	9985.3	3879

## Sheet: Dataset S8
Dataset S8. Data set matrix of the differences in fluorescence intensity before and after the addition of microbial culture media (1.0 vol%) to the AIE-polymers.
Analytes	pH = 7.0						pH = 5.0
	P-None		P-Nle		P-Pyr		P-None		P-Nle		P-Pyr
	Ch1	Ch2	Ch1	Ch2	Ch1	Ch2	Ch1	Ch2	Ch1	Ch2	Ch1	Ch2
LB	4031.2	1880.4	5484.6	2203.2	231.6	127.4	2628	1159.4	4303.4	1747.6	155.6	-15.2
LB	4413.6	2049.2	5600.6	2291.8	177.4	20	2651	1094	4232.8	1692.4	155.8	-20.2
LB	4258	1953	5278.2	2188.4	444.2	224.2	2837.4	1317.4	4431	1886.8	404.2	206.2
LB	4510.6	2023.4	5806.2	2403.6	360.8	234	2926.2	1308	4378	1892	440.2	269.2
LB	4204.2	1965.2	5364.8	2262.2	311	218.6	2923.8	1436.2	4401.4	1936.2	355.4	208.4
LB	4527.6	2069	5684	2359.8	354.2	218.8	2760.2	1300.8	4294.4	1806	403.8	204.4
LB	4609.6	2027.2	5726.4	2282.2	368	184.2	2928.8	1314.2	4606.4	1766.2	297.2	91
LB	4778.8	2162.2	6065.4	2458.2	321	172.8	3022.2	1343.2	4800.6	1880.8	340.2	146.4
LB	4664.4	2142.2	5659.6	2339.2	475.8	240.4	2923	1296.4	4638.8	1965.8	473.2	263.4
LB	4996	2208	5962	2381	461.8	265.4	3107	1409.6	4774.8	1963.4	446.8	224.6
LB	4522.4	2045	5746.2	2374.4	461.8	263.6	3051.2	1413.6	4516.8	1865.6	624.6	312.8
LB	4904.8	2182.6	5942.8	2436.6	401.4	244.2	3142	1418.8	4705	2020	450.8	255.6
LB	4568.2	2028.8	5855	2419.8	347.6	110.6	2913.4	1311.4	4623	1767.8	245.4	66
LB	5081.4	2214	6432.2	2545.4	211.8	91.2	2904	1212.8	4262.4	1699.8	162.2	0.6
LB	4552.8	2107.6	5880	2447.4	408.8	210.4	3045	1402.8	4700.2	1967.4	447	188.4
LB	5072.8	2267.4	6313.6	2631.2	400.6	202.4	3054.8	1326.4	4635.6	1947.4	304.6	156.2
LB	4431	2048.6	5744.2	2324.4	427.4	238.2	3034.6	1427.4	4606.2	1931.4	441	195
LB	4984.6	2248.8	6508	2598	349	204.2	3094	1439.8	4417.2	1871.6	357	154.4
NB	4700.4	1896.8	5656.8	2253.2	507.8	229	3405.8	1414.8	3944.4	1591.6	1757.2	722.4
NB	5054.8	2051.2	5584.4	2237.2	466	209.4	3414.8	1415.8	3815.6	1545.4	1568.2	690.8
NB	4587.4	1906	5130.2	2147.8	545.4	250	3419.4	1414.8	3935.4	1559	1818	753.4
NB	4966	2042	5294.2	2113.8	485.4	236.8	3453.8	1419	3838.8	1572.4	1666.8	694.6
NB	4406	1880.2	5214	2102	511.6	257.6	3345	1427.8	3765.8	1542.4	1647	721
NB	4784	2012	5333.2	2144.8	434.4	197.8	3266.4	1408.8	3772	1563.2	1609.8	702.2
NB	4714.4	1989.6	5401	2175.2	462	225.4	3426.2	1428	3945.2	1572.4	1775.8	741.4
NB	5148.8	2122.8	5756.2	2286	456.6	217.6	3430.2	1422.4	3806.8	1530.8	1575.4	638.2
NB	4676.4	1953.4	5252.8	2149.6	564.2	224	3350.8	1405.2	3969.8	1598	1898.6	793.8
NB	5162.4	2134.2	5577.2	2229.2	564.8	231.2	3468	1442.2	3784.8	1590.6	1609.4	710.8
NB	4471.4	1919.8	5303	2151.4	483	235	3435	1457.8	3736	1548.4	1820	773.2
NB	4945	2052.4	5378	2133	458.6	249	3386.8	1421.6	3861.4	1576.6	1642.4	706
NB	4637.4	1927.8	5396.6	2156	437.4	192.8	3373.8	1389.2	3880.2	1581	1742.4	695.4
NB	5155.2	2116.8	5684	2256	460	179.4	3465.6	1419	3678.8	1518.4	1311	520.2
NB	4630.6	1916.8	5302	2116.2	504.8	239.4	3381.4	1362.6	3959.4	1557.8	1768	779.8
NB	5272.6	2141	5526	2223	518.2	221.8	3510.6	1454.6	3768.6	1513.8	1593.4	723.2
NB	4484	1868.4	5217.2	2141.8	486.6	247	3422	1439.2	3798	1546.2	1655.2	723.2
NB	5001.6	2094.8	5598.4	2278.4	417.4	199.4	3405.8	1396	3682.2	1503.2	1592.4	667.8
R2A	447.4	197.8	3283.4	1333.2	197	87.8	373.8	142.2	1282.4	517.2	271.2	129.2
R2A	489.2	210.2	3413.4	1314.8	190.8	80.2	370.6	166.6	1240.2	530.8	247	108
R2A	434	175.2	3246.4	1295.4	216.8	109	406.4	176.2	1261.6	555.8	331.4	131
R2A	504	204.8	3409.2	1371.4	216.4	107.2	396.4	151.8	1274.6	534.4	316.8	103.2
R2A	420.2	166.4	3232.4	1291	236.6	106.2	407.2	167.2	1240.6	516.2	283.6	121.8
R2A	450.6	195.6	3414.6	1335	245.8	107	381	156	1245.4	544.6	276	112.6
R2A	399.8	216.4	3253.8	1322.4	212.6	107.6	384.4	148.4	1265.4	512.6	263.4	126
R2A	455.2	198.2	3390.4	1366.8	218.4	101.4	352.6	160.8	1272.6	526.4	255	98.6
R2A	495	161.8	3168.2	1260	239.4	98	404.6	165.6	1258.2	543.4	306.8	151
R2A	489.4	217.6	3330	1366.2	251.4	112.6	379.4	138.6	1243.2	543.2	271.2	121.6
R2A	393.6	173.2	3038.6	1244.2	232	102.2	382.6	158.6	1292.2	579.6	257.4	109
R2A	464	216.8	3230.8	1315.6	232.6	101.6	409.6	156.4	1330.6	574	264.4	120.6
R2A	437.2	184.6	3302.4	1373.8	189.8	84.4	376.6	168	1227.6	553	270	123.6
R2A	499.4	204.6	3524	1431.2	211	80.8	381.8	170.8	1195.8	517.2	252.8	104.6
R2A	434.8	182.4	3121.8	1296	223.6	101.2	397	171.6	1248.2	533	292.6	147
R2A	490.6	211.8	3288.2	1354.6	224.8	78	410	171	1252.2	524.4	263.4	127
R2A	403.4	178.6	3138.4	1290.6	210.4	99.8	357	159	1186.2	509	284.8	137.6
R2A	464	188.2	3313.4	1301.6	221.6	99.2	399	162.4	1240.6	530.2	266.2	124
0.2GAM	3199.6	1385	4596	1860.6	247	76	1751.2	742.2	3249.4	1311.4	303.4	154
0.2GAM	3421	1467	4462	1757.4	165	69.8	1738.4	771.8	3234.6	1290.2	356.2	131.2
0.2GAM	3200.2	1431.8	4340.4	1768.8	257.6	151.2	1791	790	3272.4	1357	392.4	217.4
0.2GAM	3478.2	1516.6	4760.2	1916.4	302.8	160.6	1811	852.4	3362.2	1344.2	399	173
0.2GAM	3145	1368.4	4344.4	1794.6	285.6	128.4	1768	760.4	3243.2	1354.2	405.4	190.8
0.2GAM	3409.6	1452.6	4671	1889.4	292	117.6	1793.6	791	3324.4	1396.2	392	181.8
0.2GAM	3331.8	1417.2	4681.2	1834.8	168.4	50.2	1751.2	773.6	3443.8	1331	333.8	115.2
0.2GAM	3545	1465.6	4888.8	1934.2	185.6	87.4	1744.6	726.2	3259.2	1301.6	263.2	118.2
0.2GAM	3293	1448.4	4737.6	1885.4	285.2	120.4	1788.6	816.6	3442.8	1415	429.8	188.6
0.2GAM	3538	1503	4781.2	1939.8	257.4	154.2	2010.6	994.8	3341.4	1359.4	385.2	164.4
0.2GAM	3089	1343	4339.2	1782	289.8	158	1750.8	764.2	3389.6	1407.2	464.2	228.4
0.2GAM	3464	1532.6	5098.2	1979	258.2	103	1766	802.2	3263.8	1294.2	375.2	151.8
0.2GAM	3382.4	1405.4	4813.2	1888.8	170.2	87	1845.8	785.2	3469.2	1374.2	344.8	124
0.2GAM	3500.8	1442.2	4852.4	1917.6	313.8	83.6	1854.8	801	3416	1390.4	317.4	166.2
0.2GAM	3268.8	1436	4778.8	1962.8	327.8	153	1870	846.8	3379	1361.8	414	218.4
0.2GAM	3601.6	1563.6	4852.2	1950.6	302.2	127.2	1868.2	799.8	3402.6	1418.6	422.2	183
0.2GAM	3269	1431.8	4717.4	1917.2	286.6	126.6	1821	802.8	3301.2	1380.8	396	177
0.2GAM	3549	1549.6	4731.8	1904.6	303.2	158	1836	804.8	3280.6	1412.6	389	160.6
GAM	1719.4	681.4	2787.2	1046	303.2	181.2	1424.6	576.2	2285	905.8	490.4	118.6
GAM	1754	719.6	3082.6	1099.6	406.4	66	1254.6	507.8	2115.4	807	395.2	111
GAM	1867	880.2	3181.8	1361.8	636.6	387.4	1579	884.2	2701.6	1276.6	1035.8	649.6
GAM	2095	1070.2	3362.2	1449.4	634.6	363	1556.2	906.2	2411.6	937.4	421.8	271.6
GAM	1801.6	832.6	3011.2	1254.8	393.8	159.4	1843.6	1029.2	2977.4	1594.2	1308.6	814.6
GAM	2042.4	1041.2	3195.2	1319.8	601.6	417.2	1887.4	923.4	2319.8	976	673	375.8
GAM	1506.8	630.6	2642.4	935.8	185.2	50.2	1987.6	1064.6	2305.2	892	663.2	316.6
GAM	1687.4	699.6	2771.6	888.4	235.6	50.2	1203.2	540.6	1920.8	552.2	-85.6	-255.2
GAM	1764.4	733.6	2961.8	1292.6	610.4	352.4	1555.6	808.6	2631.4	1212.6	863	549
GAM	1823	940.2	3100.8	1351.8	514.4	262	1573.6	737.4	2212.6	907.4	395.8	170
GAM	1741.6	881	2890.2	1286.2	539.8	250	1621.6	792	2647.2	1279.2	1133.6	803.2
GAM	1544.8	629.2	2852	1094.8	470.4	177.4	1467.8	781.6	2172.8	838.4	528.6	247.4
GAM	1478.4	648.2	2615.6	940.8	249	171.6	928.4	228.2	2311.8	909	355	132.8
GAM	1327	458.2	2523.4	824	80.6	-16.4	1447.2	652.8	2078.8	618.4	264.4	-46.6
GAM	1656.2	825.6	2939	1289.6	624.4	428	1231.4	584.2	2834.6	1418.4	717	357.6
GAM	1580.8	595.8	2697.6	1022.2	573.2	446.8	1781.6	956.6	2424.2	1036.4	554.2	316.6
GAM	1782.6	841	2773.8	1132.8	705.8	443.2	2121.6	1303	2808.6	1383.8	898.4	619.2
GAM	1787.6	820.2	2684.2	1054.2	374	229.4	1630	950	2294.2	885	372.4	296.6
water	188	68.4	2116.2	842.8	189.2	73	186.4	77.6	500.8	231.8	281.2	124.6
water	254.6	84.6	4436	2500	217.4	95.4	188.6	80	489.6	190.6	274.4	112.8
water	197.4	76.4	1971.4	774.6	243.2	127.8	173.4	68.2	487.6	203.6	298.6	120.2
water	213.4	77.6	2156.6	852.2	193.4	82.4	191.2	84.8	499.8	211.4	269.6	116.2
water	170	71.6	1930.8	767.6	181.2	87.2	35.6	-14.8	496.6	212.4	278.6	122
water	218.6	84	1999.4	788.8	216.4	87.8	197	73	505.4	212.6	261.6	115.4

## Sheet: Dataset S9
Dataset S9. Data set matrix of the differences in fluorescence intensity before and after the addition of supplements (0.02 vol%) stored for different periods to the AIE-polymers.
Analytes	pH = 7.0												pH = 5.0
	P-None		P-Phe		P-Nle		P-Suc		P-Pht		P-Pyr		P-None		P-Phe		P-Nle		P-Suc		P-Pht		P-Pyr
	Ch1	Ch2	Ch1	Ch2	Ch1	Ch2	Ch1	Ch2	Ch1	Ch2	Ch1	Ch2	Ch1	Ch2	Ch1	Ch2	Ch1	Ch2	Ch1	Ch2	Ch1	Ch2	Ch1	Ch2
YE1_0min	8074.6	3834	9518.4	4122.2	8578	3672.2	1737.2	1408.6	3549.4	1928.6	1418.8	1294	8438.8	4098.2	9572.2	4153.4	8779	3969	2977.2	2012.6	12117.4	4576.8	1454.8	1413.4
YE1_0min	7975.6	3870.4	9119.4	3835.8	8235.6	3492.6	1624.4	1254.6	3510	1811.2	1360	1187.8	8025.4	3802.2	9050.2	3740.6	8639.6	3636	2921.8	1939.6	11797.8	4498.2	1498.4	1489.6
YE1_0min	7968.2	3836.8	9366.4	3955	8772.8	3698.6	1626.8	1335.4	3563.6	1932.2	1366.8	1205.8	8286.4	3900.2	9666.8	4208.2	8830.6	3790	2803.6	1790.4	12005	4649.2	1372	1276.4
YE1_0min	8534.8	4035	9519.8	3929.4	9019.4	3789.2	1639.6	1210.8	3620	1912.4	1350.2	1136.2	8653	4166.2	9868.8	4169.4	9130.6	3862.8	3069.6	2017.2	12489.2	4678	1060.4	925.2
YE1_0min	8359	3926.4	9543.2	4084.8	8534.2	3586.8	1582.4	1310.8	3595.8	1915	1301	1156.6	8684	4058.8	9890.6	4192.8	9256	4052.6	3073.8	1915.8	12239.2	4673.4	1255	1283.8
YE1_0min	8273.8	3967.6	9156.2	3833.8	8325.8	3562.6	1573.2	1309.2	3470.6	1823.6	1319.8	1202	8249.6	3964.6	9490.2	4098.4	8836.6	3859	3037.4	1894	11919.4	4639.4	1439	1418.8
YE1_10min	7744.8	3903.6	8356.6	3701.6	7818.2	3468.8	1910.4	1339.2	3965.2	2137.4	1631.8	1387	8040	4017.6	9291.4	4252.2	8865.2	4200.8	3678.8	2440.6	11989	4881	1820.6	1535.6
YE1_10min	7559.2	3760.8	8259.2	3556.8	7516.4	3201.4	1913.8	1318	3897.4	1977	1573	1314.2	8007.8	4032.2	9201.2	4129	8612.4	4024.8	3630.8	2488.6	11483.6	4751.6	1720.6	1642.6
YE1_10min	7762.2	3777.2	8550.2	3742.4	7653.6	3370	2021.6	1596.2	3974.6	2175.4	1559.8	1274.6	7929.6	4076.8	9569.2	4347.6	8852.6	4121.6	3586.6	2293.2	11466.6	4682	1821.2	1579.2
YE1_10min	7897	3827.6	8726.4	3760.8	8013.6	3413.2	2013.4	1431.8	4059.4	2132.4	1461	1214.8	8561	4218.6	9819.2	4448.2	9397.8	4152	3719.4	2414.2	12032.2	4562.2	1885.6	1728
YE1_10min	7722.6	3910.4	8784.2	3847	7539.8	3309.2	2106	1530.2	4018.8	2168.4	1536.4	1220.4	7732.2	3936.2	9748.4	4467.2	8588.6	4010.6	3517.8	2284	11244.4	4441	1805.8	1685.6
YE1_10min	7389.2	3704	8342	3606.6	7433.4	3180	2004.8	1477	3966.4	2124.6	1585.2	1267.4	7616	3872	9485.4	4315.2	8655.4	4033.8	3550.4	2347	11616	4807.6	1939	1645
YE1_20min	7263.6	3645	8216.4	3691.2	7425.8	3170.8	2067.2	1485.2	3908	2075.2	1666.2	1425.6	7891.6	4060	9022.8	4078	8758.8	4093	3929.2	2582.2	11102.6	4636.8	2148.8	1952.6
YE1_20min	7122.8	3579.4	8023.4	3513.8	7246	3076.6	1903.6	1394.2	3886.6	2120.8	1581.8	1361.6	7938.6	3914	9545	4293.2	8548.2	3889.8	3709.2	2414	11371.8	4698.4	1934.6	1705.2
YE1_20min	7129.2	3652.4	8403.2	3787.8	7512.8	3285.6	2111	1456	4057.6	2271.6	1634.8	1346.6	8299.2	4207.2	9884.2	4455	8874.2	4141.8	3813.4	2524.4	11223.2	4577.6	2069.4	1725.4
YE1_20min	7504.8	3629.2	8290.2	3636.6	7509.6	3218.8	2061.4	1449.8	4196.8	2177.6	1648.2	1308	8450	4248.6	9813.8	4378.6	9066	4209	3876.2	2546.8	11269	4614.8	2176.2	1918.4
YE1_20min	7109.4	3536.2	8152	3587.8	7255.8	3199.4	2036.4	1375.8	3996.2	2200.2	1588.8	1255.6	8451.8	4286.4	9488.4	4324.2	8473.2	3970.2	3672.2	2314.4	11033.6	4501.2	1906.4	1661
YE1_20min	7034.6	3508.6	8062.2	3576.8	7071.6	3148	1896.8	1410.8	3844.4	2130.4	1560.6	1272.8	8086	4011	9153.2	4163.4	8603.2	3989.4	3594.4	2336.8	10932	4461.8	2110	1781
YE1_30min	7022.2	3615	8159.4	3729.8	7316	3335.6	2431.6	1662	4347.2	2436.8	1821.2	1449.4	8077.2	4156.2	9883.4	4563	9503.4	4409.8	4054	2669	11643.6	4824	2335.4	1930
YE1_30min	6894.6	3440	8053.6	3491.6	7137.4	3109	2231.6	1479	4144	2205.4	1707.4	1240	8114.2	4287	9736	4334.4	9207.6	4311.6	3749	2361.4	11356.2	4656.6	2059.2	1801.4
YE1_30min	7025.2	3653.2	8335.6	3648.6	7330.2	3251.8	2239.6	1633.4	4143.8	2154.4	1863.2	1453.4	8082.2	4200.6	9894	4473.2	9188.6	4349.2	4020.4	2510	11496	4706.4	2213.2	1927.4
YE1_30min	7213	3570.8	8326	3571	7318.4	3138.4	2787.6	2010.8	4367.6	2502.8	1834.4	1412.6	8249	4121.6	10034.8	4556.2	9233.2	4347.8	3984.4	2567.6	12018	4908.4	2170.2	1838.4
YE1_30min	7197.4	3601.8	8043.4	3643.4	7087.4	3121.4	2430.6	1669	4258	2297.6	1753.4	1391.6	8371.6	4298.8	10145.2	4579.8	8753	4124	3896.8	2413.6	11206.6	4657.4	2113.4	1832.2
YE1_30min	6934.8	3449	7955	3548	7006.2	3152.2	2383	1695	4176.6	2284	1839.4	1534.8	7805	4021.6	9836.6	4541.4	9269.6	4297.8	3974.6	2512	10875.2	4566	2147.2	1813.8
YE2_0min	7582.2	3589.8	8236.2	3596.2	7665.6	3102.8	1995.4	1550.2	4632.6	2365.2	1216.4	1088	8289.2	4180.8	9459	4155	9055.6	4188.2	3256.4	2181	12556.4	4820.2	1453.4	1604.8
YE2_0min	7273	3465.8	8217.2	3440.4	7699.2	3163.2	1785.2	1371.4	4404.8	2234	1112.2	1076.2	8335.4	4126.2	9395.2	4169.8	9292.2	4078.2	3045.4	1944.2	12540.4	4760.2	1379.4	1447.8
YE2_0min	7617.6	3605.8	8576.6	3541	7940.8	3244.2	1857.6	1497.8	4733	2456.6	1248.8	1169.4	8069.4	4111.4	9697.4	4291.4	9014.6	4113.2	3266.2	2207.2	12278	4730.2	1362	1477
YE2_0min	7728.4	3642.2	8647.6	3491	7987.4	3214.6	1995.8	1576.8	4813.2	2489.8	1272.8	1172.8	8770.8	4309.6	9725.8	4238	9376.8	4054.6	3222.2	2170.4	13570.2	5149.6	1282.8	1426.6
YE2_0min	7761	3676.2	8532.4	3538.8	7918.4	3200.8	1629	1432	4603.4	2426.2	1254.4	1005.4	8471.8	4161.6	9842.8	4297.4	8650	3934.8	3124.4	2078.8	12640.2	4848.6	1376	1438.2
YE2_0min	7555.2	3589.6	8621	3570.4	7752	3188.6	1780.6	1395.2	4649.4	2309.2	1185.6	1090.2	8116.4	3985.2	9496	4180.4	8876.4	3934.6	3181.6	2008.6	12295.4	4715.6	1308.6	1520.8
YE2_10min	7221.4	3555.6	7514	3378.2	6571	2810.2	2543.6	1964.6	5236	2893	1602.4	1366	7858	4018.4	8824.4	4126.2	9025.4	4376.8	3619.2	2452.4	11382.8	4718.2	1817.4	1751.4
YE2_10min	7065.4	3552.2	7391.6	3206.6	6499	2871.4	2490.2	1888.2	5060.2	2744.4	1434	1263.6	7667.4	3965.2	9022.2	4097.2	8367.8	3870.6	3455	2381.6	10652.2	4449	1682.8	1691.2
YE2_10min	7034.2	3518.4	7528	3353.8	6621.8	2981.4	2511.2	1981.8	5273.2	2865.2	1507.6	1334	8039	4184.6	9170.4	4323	8810.2	4189.8	3610.6	2301.4	11317.4	4634	1758	1729.8
YE2_10min	7348.8	3575.8	7614.8	3191.8	6897.4	2901.2	2379.6	1724.2	4930.8	2729.6	1435.4	1221.4	8256.8	4247.4	9226.2	4239.4	9378	4370	3724.6	2451.8	11079	4686	1790.2	1788.4
YE2_10min	7150.4	3504.2	7388	3196.8	6647.2	2939.4	2581	1879.8	5145.6	2803.4	1598.2	1403.6	8043.8	4149.2	9199.2	4164.4	8322.2	3946.8	3553.6	2401.6	10912.4	4494.8	1769.6	1839
YE2_10min	6832.8	3366.4	7406	3223.2	6399.4	2857.4	2363.6	1831.4	5000.8	2794.2	1533.8	1364.2	8061.2	4150.4	8947.2	4204.8	8415.6	3941.8	3601.6	2321.4	10799.2	4451.6	1690.2	1780.4
YE2_20min	6504	3326.2	6860.6	3172.4	6154.8	2710.2	1941.2	1384	4629.8	2364	1377.4	1198	7841	4036.2	9189.6	4287.8	8363.4	4023.8	3558.8	2467.8	11281.4	4665	1868	1901.2
YE2_20min	6426.6	3228.8	7072.6	3171.4	6164.6	2834.6	1917.2	1443.8	4471.2	2225.6	1321.2	1215.8	7843.6	4004.4	8549.8	3992.4	8411.6	3921	3502	2318.8	10617.4	4397.4	1649.6	1654.6
YE2_20min	6876	3434.2	7080.8	3253.6	6202.8	2791.6	1962.6	1454	4868.6	2553.2	1455.6	1208.8	7881	4044.8	9351	4282.8	8827.6	4240.6	3517.2	2322.2	11448.4	4515	1780.2	1663
YE2_20min	6825.4	3333	7021	3061	6204.8	2686.8	1944.8	1249.8	4581.6	2322.4	1312	1160.8	8010	4250.8	8855.8	4104	8683.6	4080	3458.6	2355.8	11050	4599.2	1672.8	1673.2
YE2_20min	6776.8	3277.4	6872.8	3057.2	5864.2	2647.6	1893.4	1437.2	4637.2	2475.8	1418.4	1309	8068.8	4127.6	9080.6	4198.2	8409.4	3909	3328.8	2212.8	10918.4	4547.2	1617	1622
YE2_20min	6471.4	3199	6783	2984	5979	2625.8	1863.4	1294.4	4527.8	2382	1329.8	1259.2	7677.2	4031.4	8842.6	4092.8	8562	3988.6	3441	2367.6	10839.8	4572.4	1617.6	1658.6
YE3_30min	6572.4	3346.4	6696.8	3114.8	6193.8	2791	2067.2	1450.2	4549.8	2313.4	1544.8	1289.6	7578.6	3975.8	8812.8	4281.8	8352.2	4058.2	3586	2430.4	10488.6	4431.6	1970.6	1851.8
YE3_30min	6461.8	3324.8	6835.4	3066	6129.4	2701.6	1933	1400.2	4390.6	2211.2	1349.4	1206.2	7396.2	3931.6	8730.2	4045.8	7986.2	3923.8	3420.6	2161.2	9826.6	4205.8	1729.8	1701.6
YE3_30min	6664.8	3334.6	7063	3193.2	6100.4	2797.8	2175	1548.8	4410.2	2196	1652.6	1362.4	7985	4180.8	9522.4	4338.8	8741.2	4074.4	3832.8	2530.2	10419	4394.2	1902	1766.6
YE3_30min	6796	3346.4	7007	3069.4	6313.8	2728.6	2071.4	1375	4570.2	2268.8	1469.8	1173.8	8020.6	4102	9241.2	4407.2	8652.2	4057.6	3790	2430.4	10943.8	4640.2	1943.2	1869.2
YE3_30min	6775.8	3342	7070.6	3105.4	6083.8	2681.8	1955.2	1331.6	4343	2229.4	1587.6	1360.6	7995.4	4115.8	9709.6	4468.2	8595.2	3904.2	3613.6	2274.6	10785.6	4419.8	1880	1708.8
YE3_30min	6504.2	3225.6	6932.2	3103.8	6049.6	2712.4	2087.8	1474.4	4316	2231.2	1617.2	1337.8	8019.4	4169.2	9270.2	4187.6	8646.8	3983.6	3555.8	2433.2	10486.8	4398.4	1658.4	1708.2
